# Supplementary material
Source: PubMed Central journal article supplement (PMC4151345)

# Supplementary Information

## Syntheses and biological evaluation of 2-amino-3-acyl-tetrahydrobenzothiophene derivatives; antibacterial agents with antivirulence activity

Hung The Dang,<sup>a</sup> Erik Chorell,<sup>a</sup> Hanna Uvell,<sup>b</sup> Jerome S. Pinkner,<sup>d</sup> Scott J. Hultgren,<sup>d</sup>  
Fredrik Almqvist<sup>a,b,c</sup>

<sup>a</sup>*Department of Chemistry, Umeå University, SE-90187 Umeå, Sweden*

<sup>b</sup>*Laboratories for Chemical Biology Umeå LCBU, Umeå University, SE-90187 Umeå, Sweden*

<sup>c</sup>*Umeå Center for Microbial Research UCMR, Umeå University, SE-90187 Umeå, Sweden*

<sup>d</sup>*Department of Molecular Microbiology, Washington University School of Medicine, St. Louis, MO 63110, USA*

### Table of contents

Figure S1. Effects of 2-amino-3-acyl-tetrahydrobenzothiophene derivatives on bacterial growth

Figure S2. Antibiofilm activity of compounds **24-39** compared with compounds **2**, **19**, **21** and **23**

<sup>1</sup>H-NMR and <sup>13</sup>C-NMR spectra of all synthesized compounds

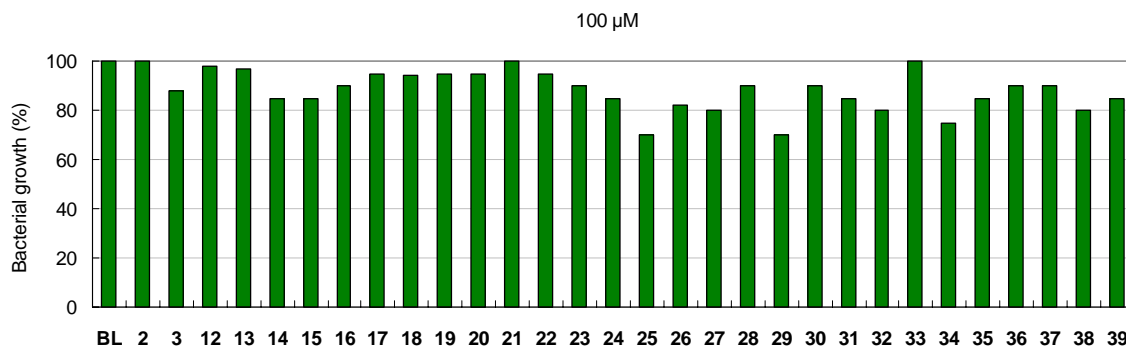

**Figure S1.** Bacterial growth at 100  $\mu$ M for 24 h showed that the compounds do not affect the bacterial growth of *E. coli* UTI89, BL (blank, only UTI89 + DMSO).

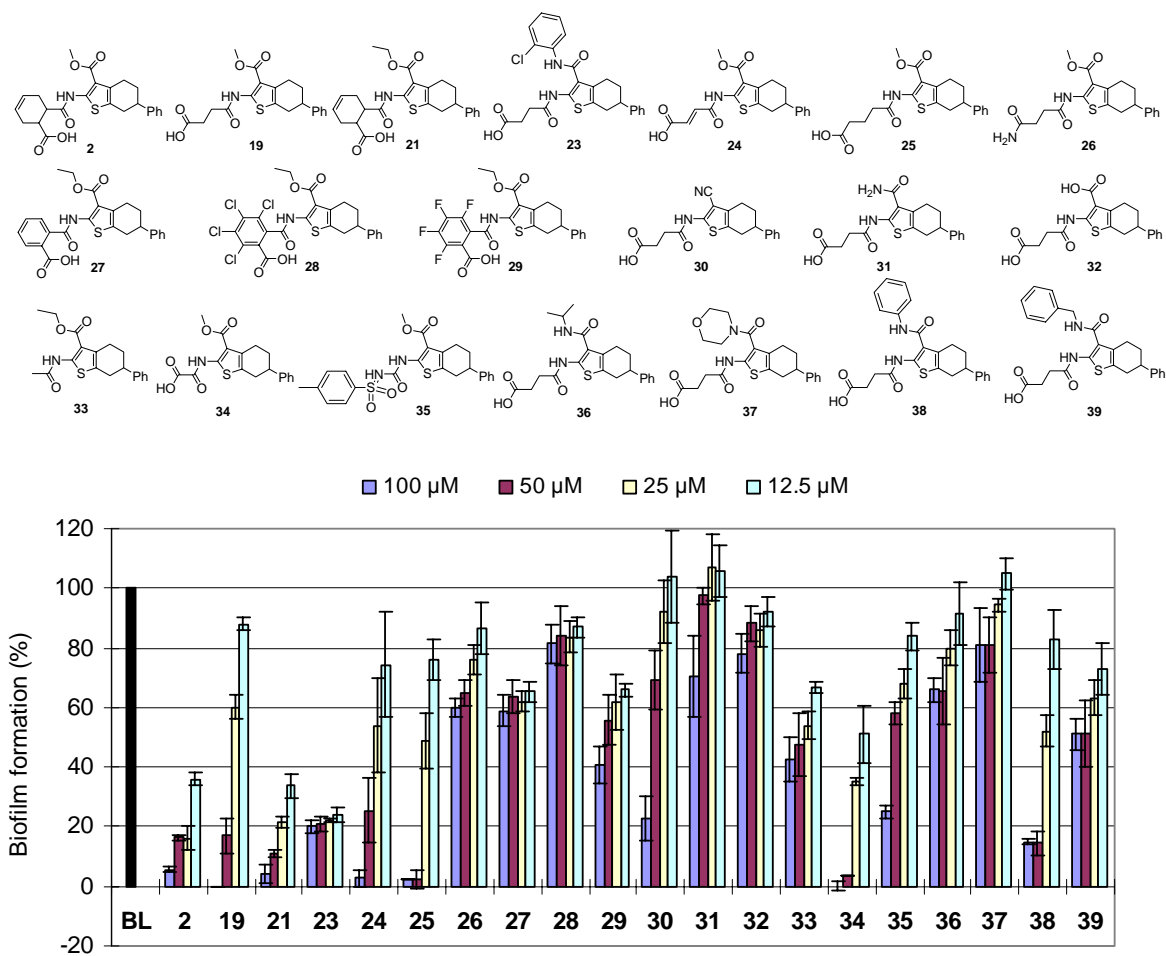

**Figure S2.** Antibiofilm activity of compounds 24-39 compared with compounds 2, 19, 21 and 23, BL (blank, only UTI89 + DMSO). The data represent means  $\pm$  SD of triplicate experiments.

# $^1\text{H}$ -NMR and $^{13}\text{C}$ -NMR spectra

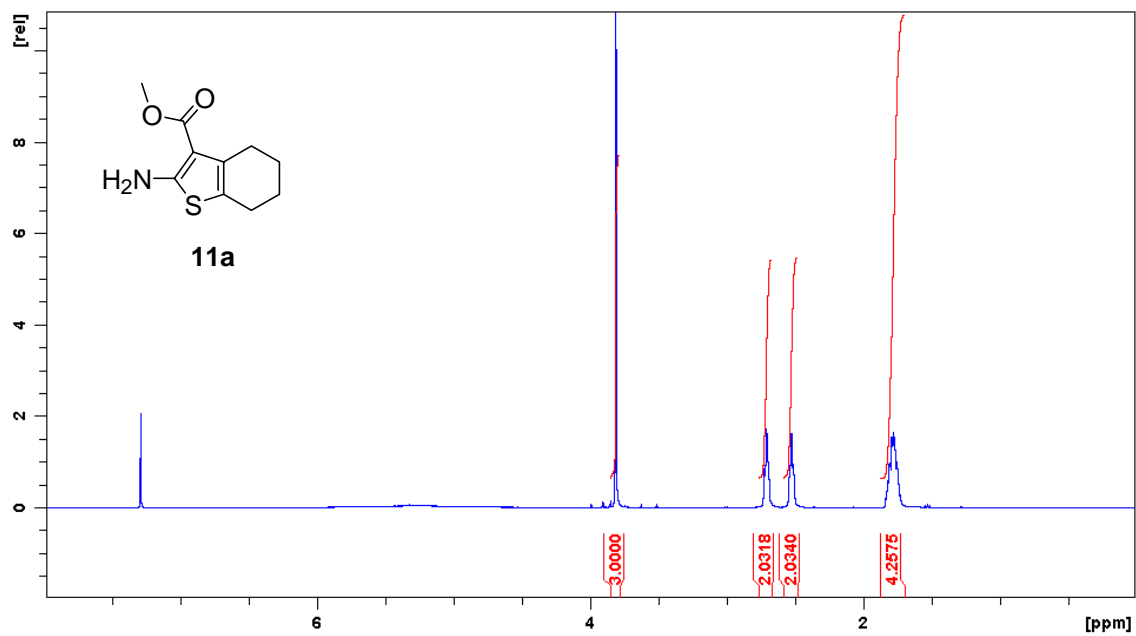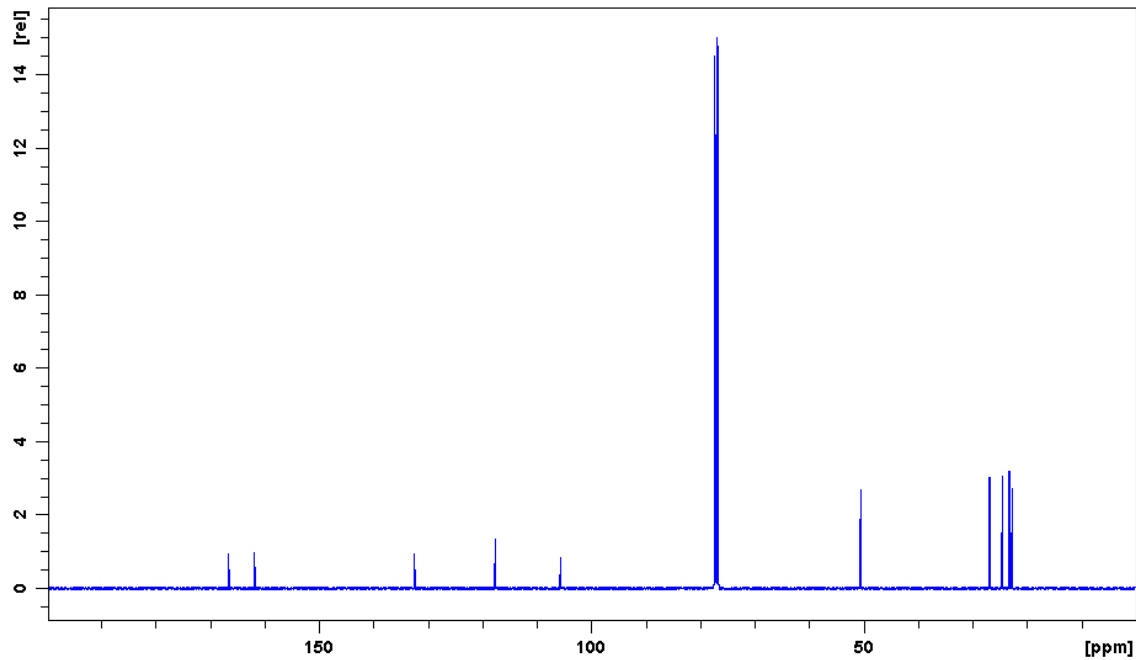

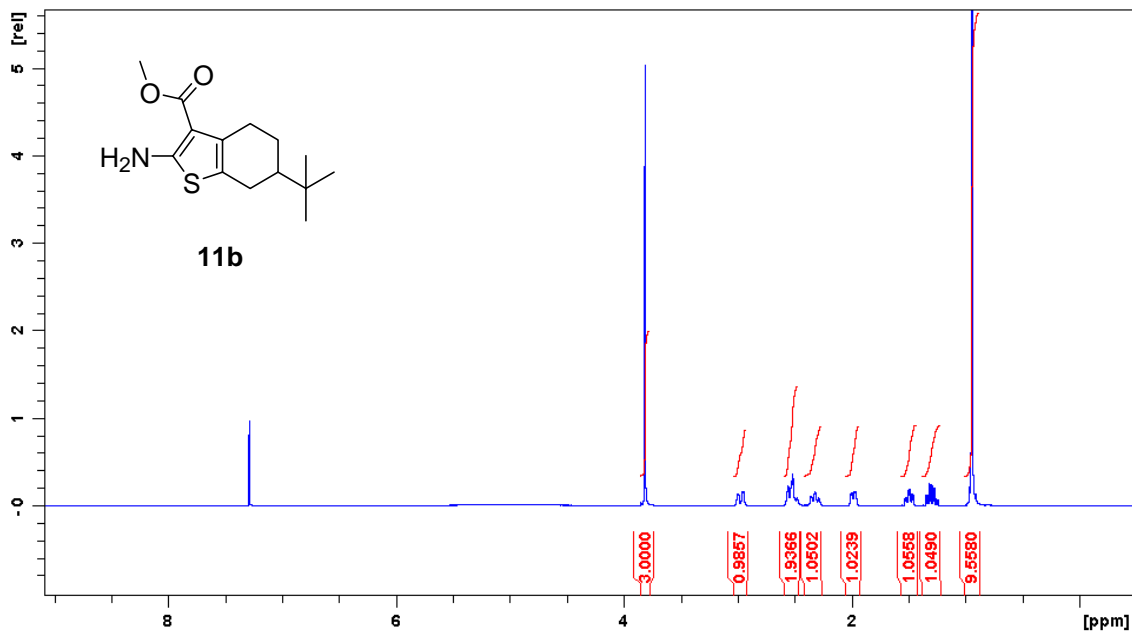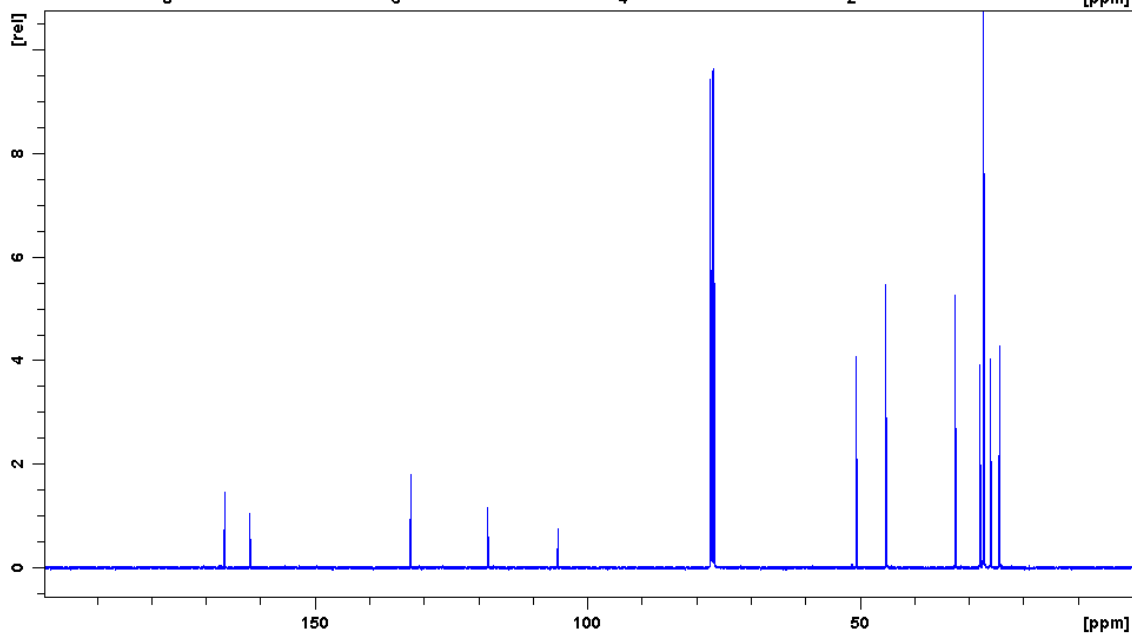

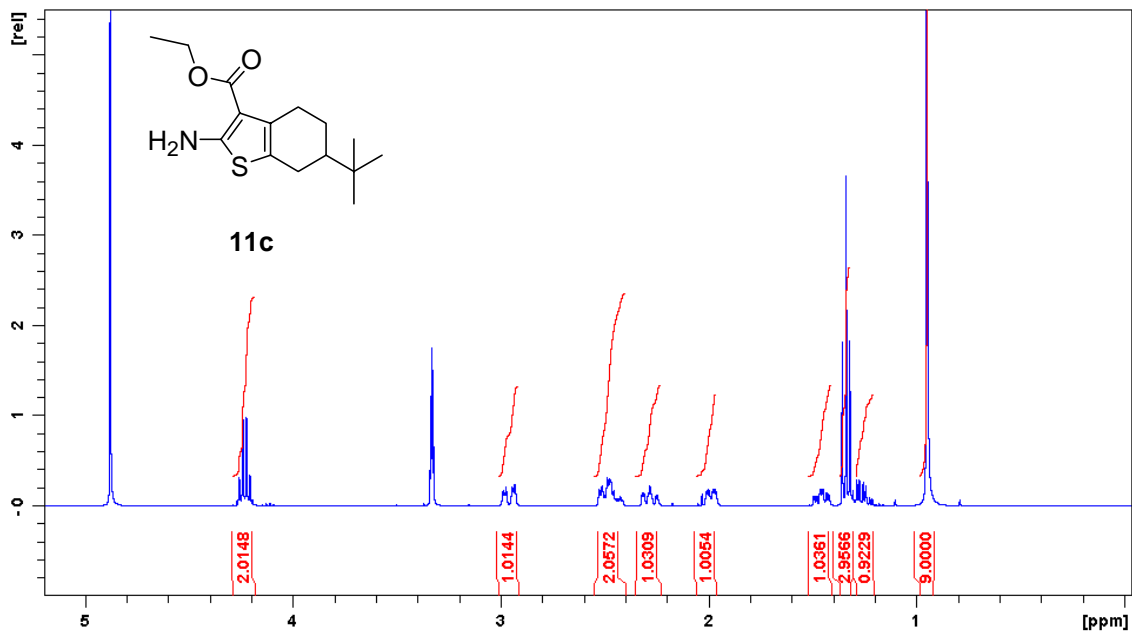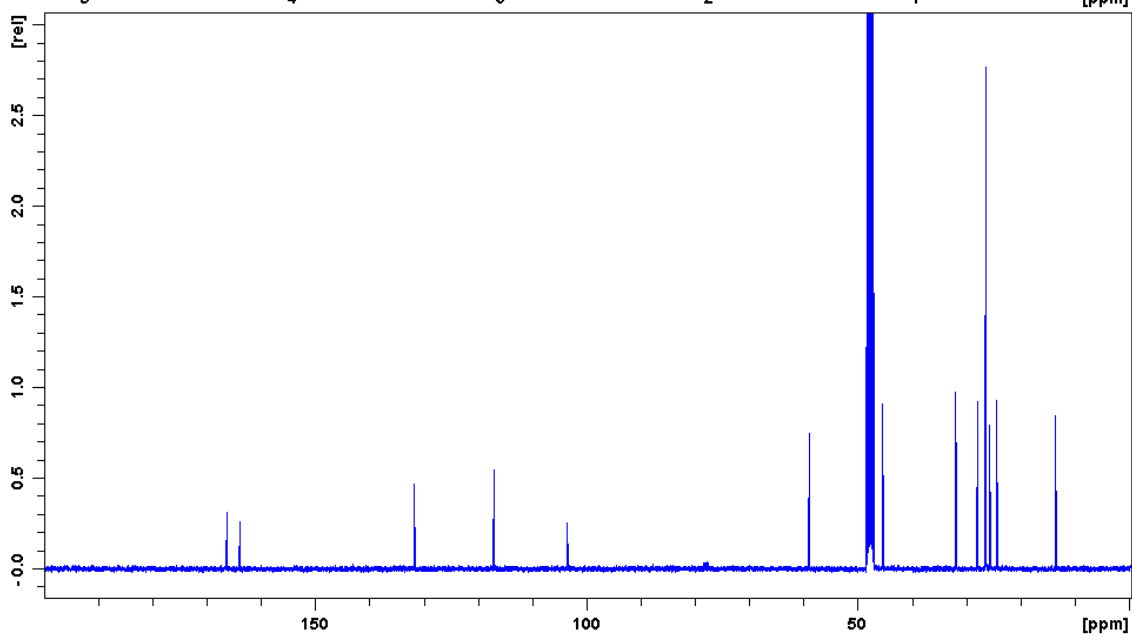

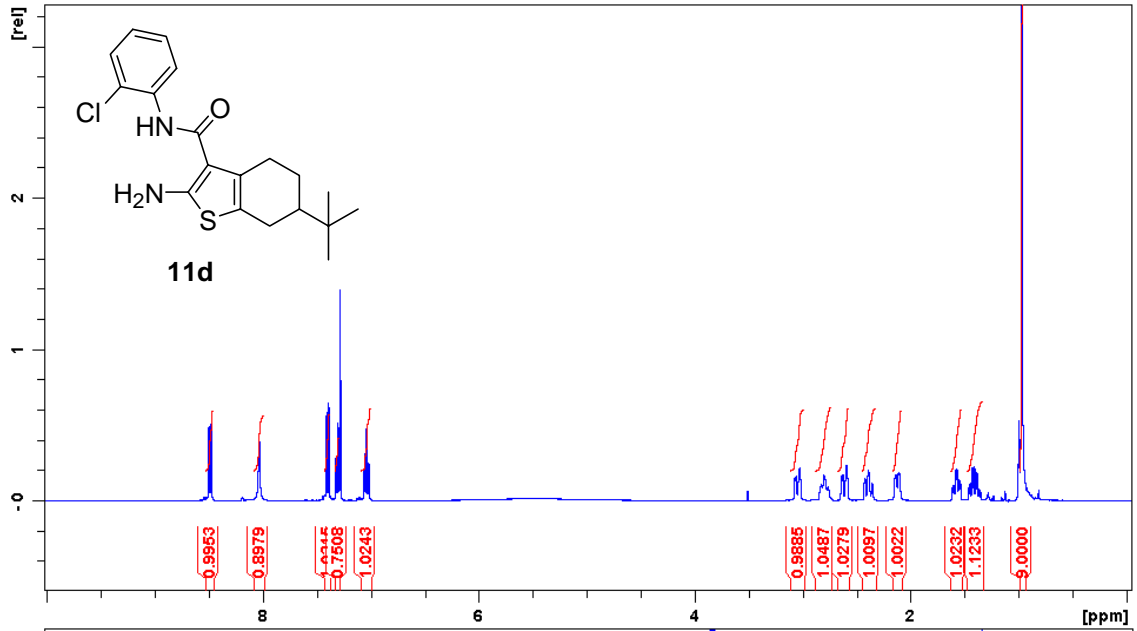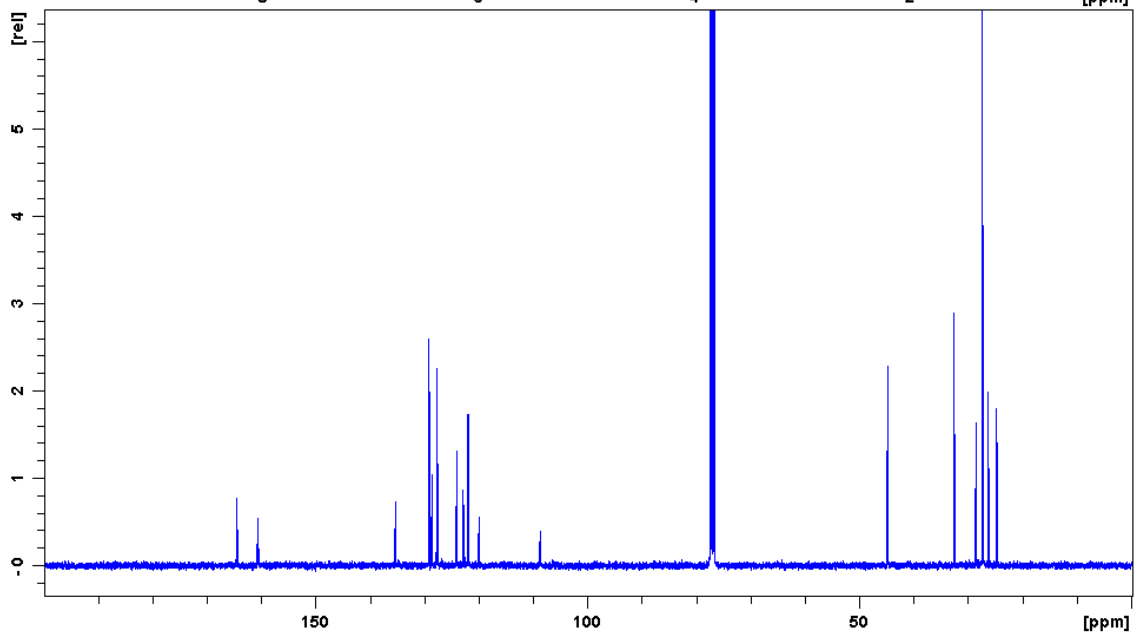

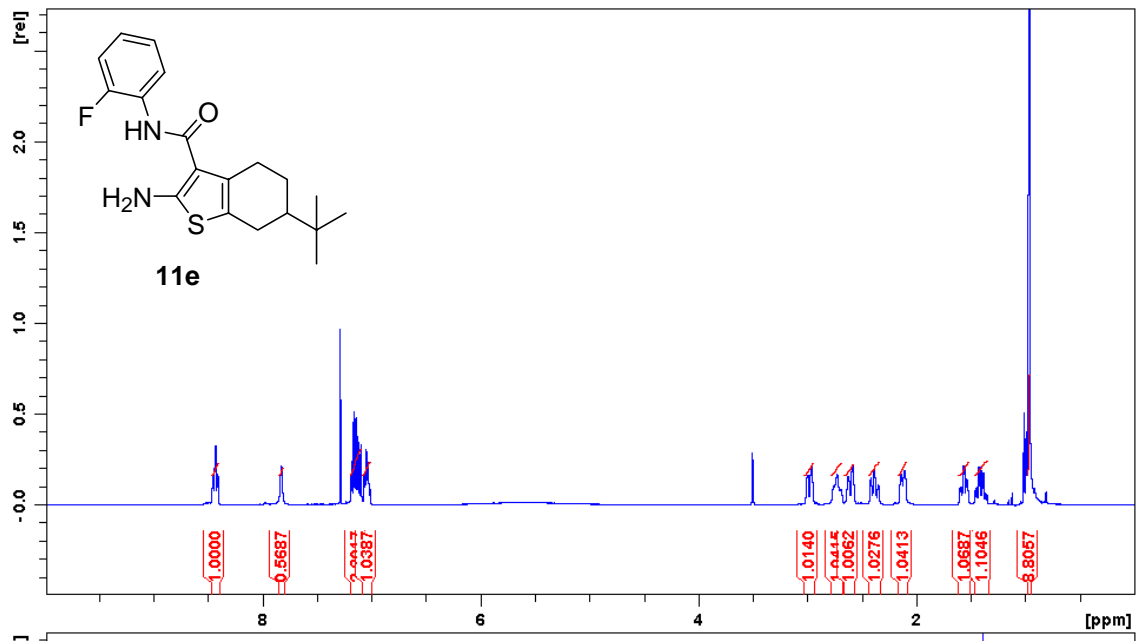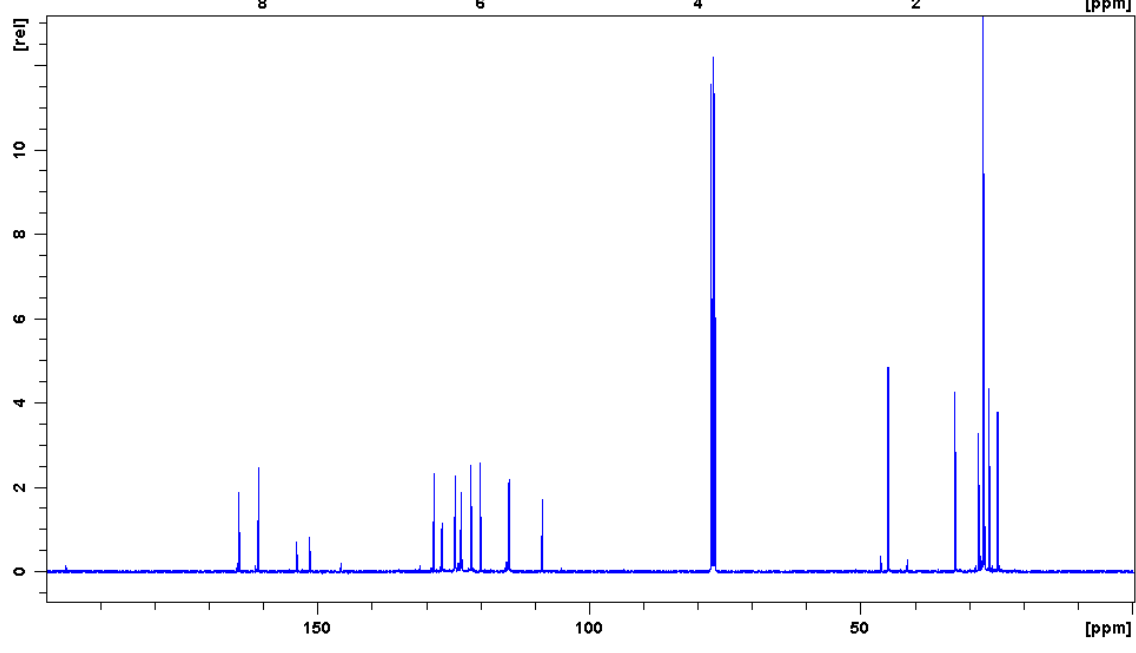



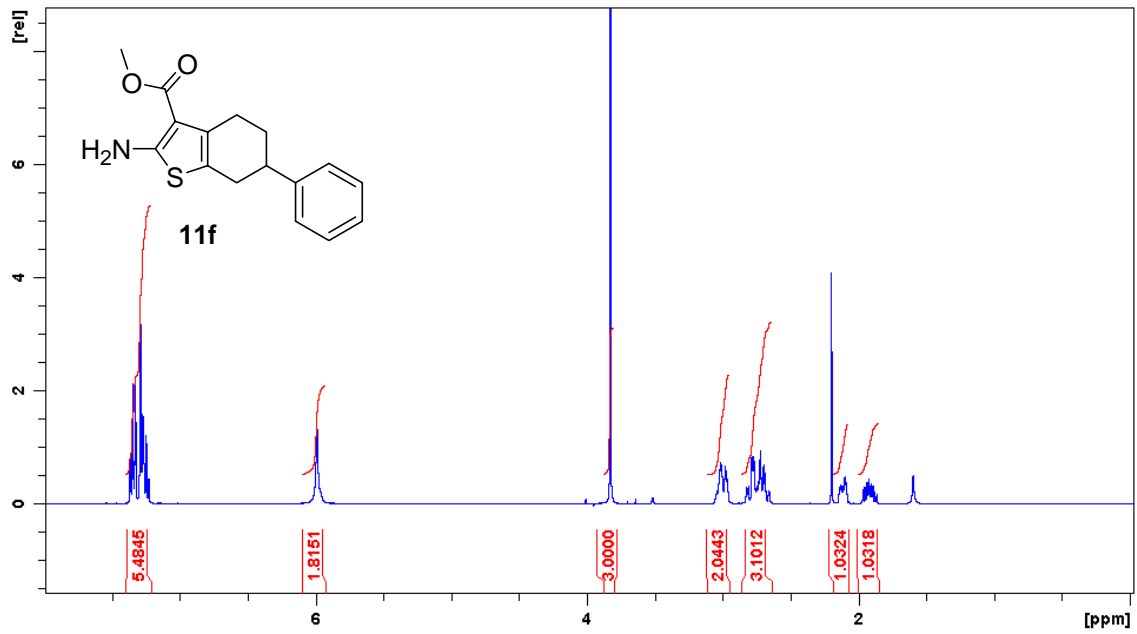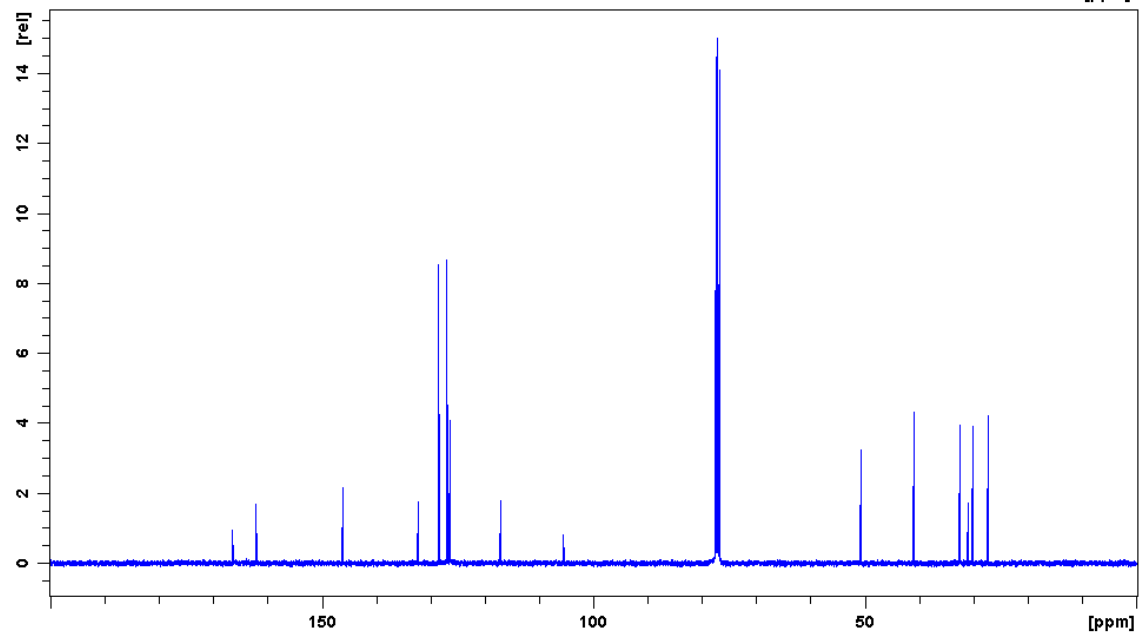

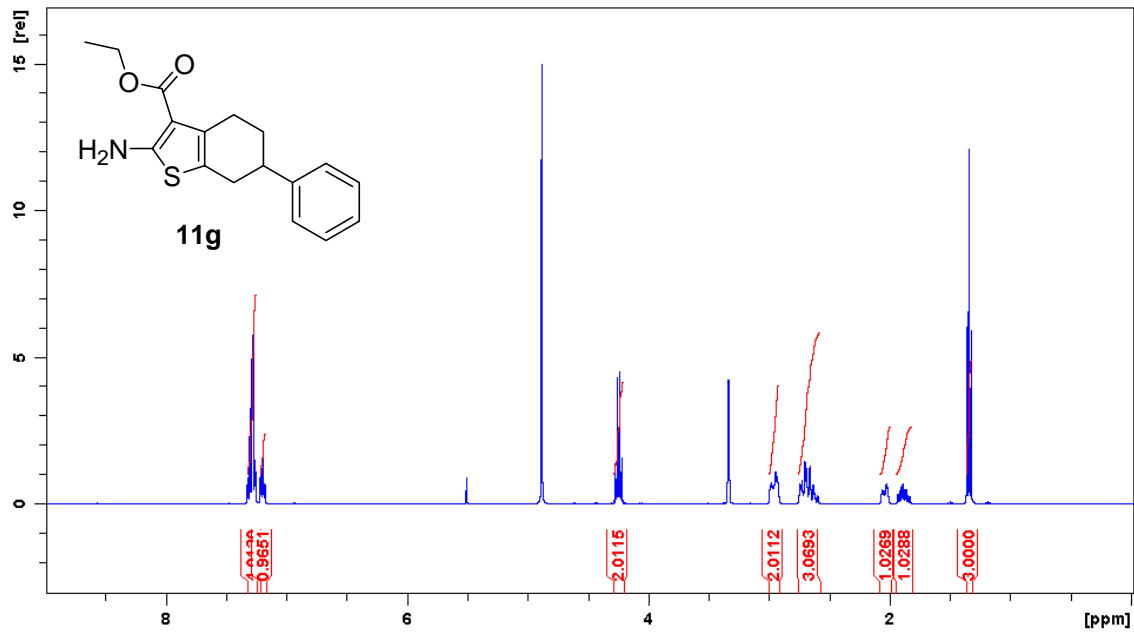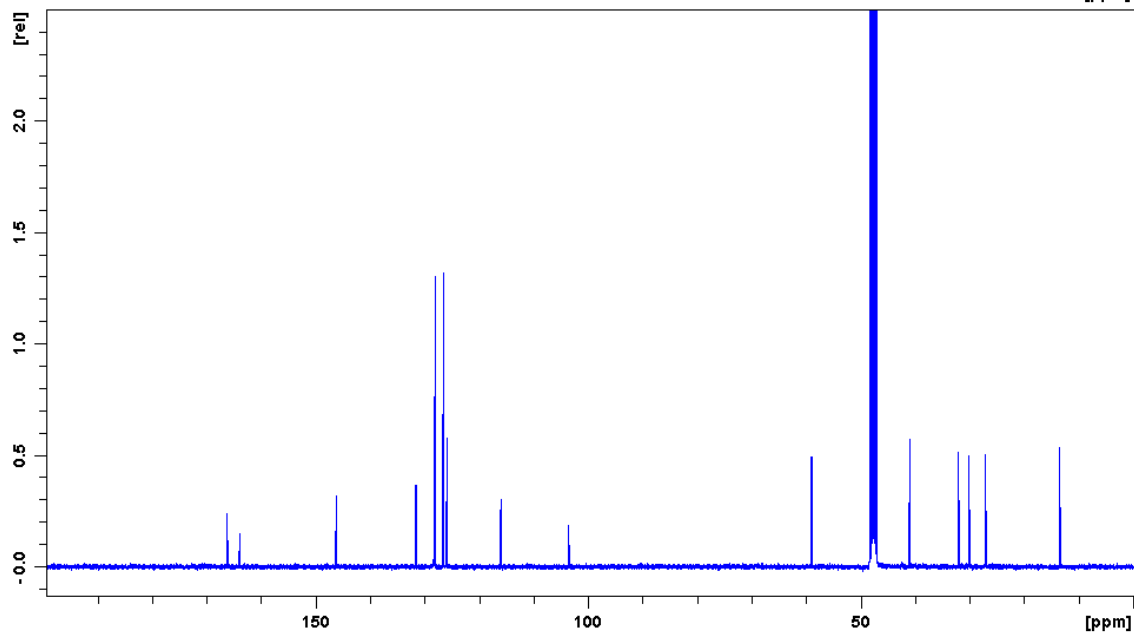

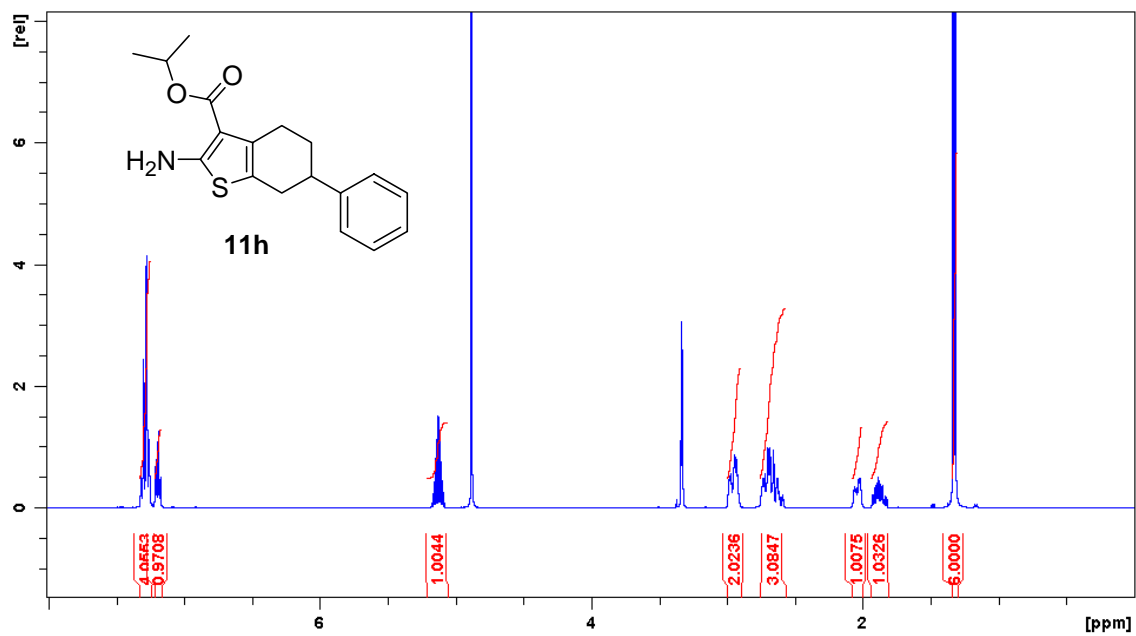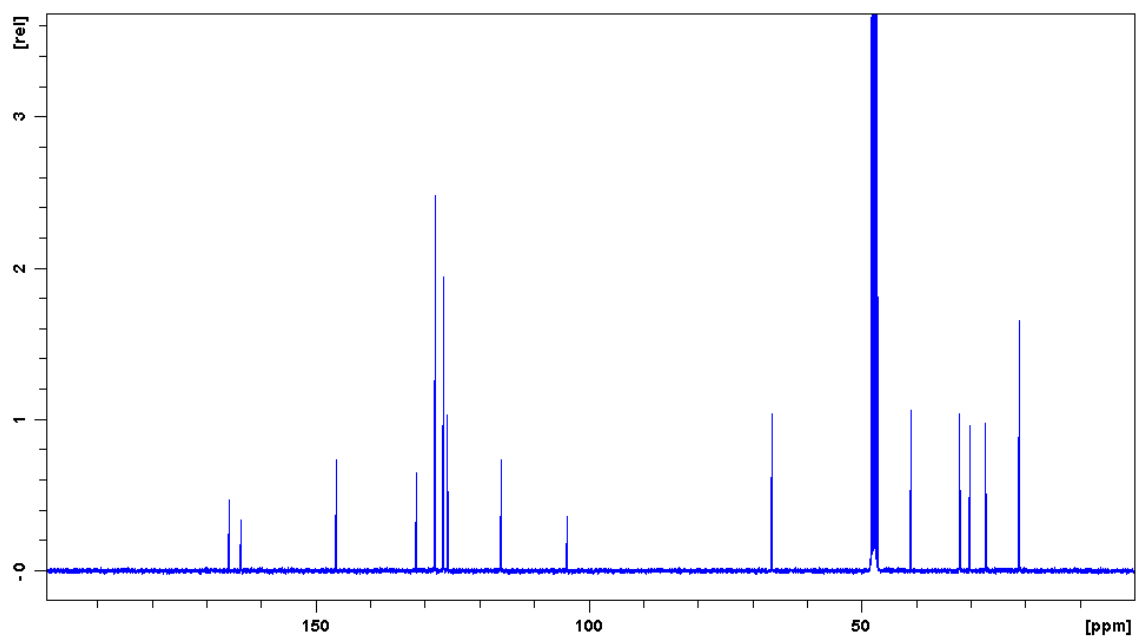

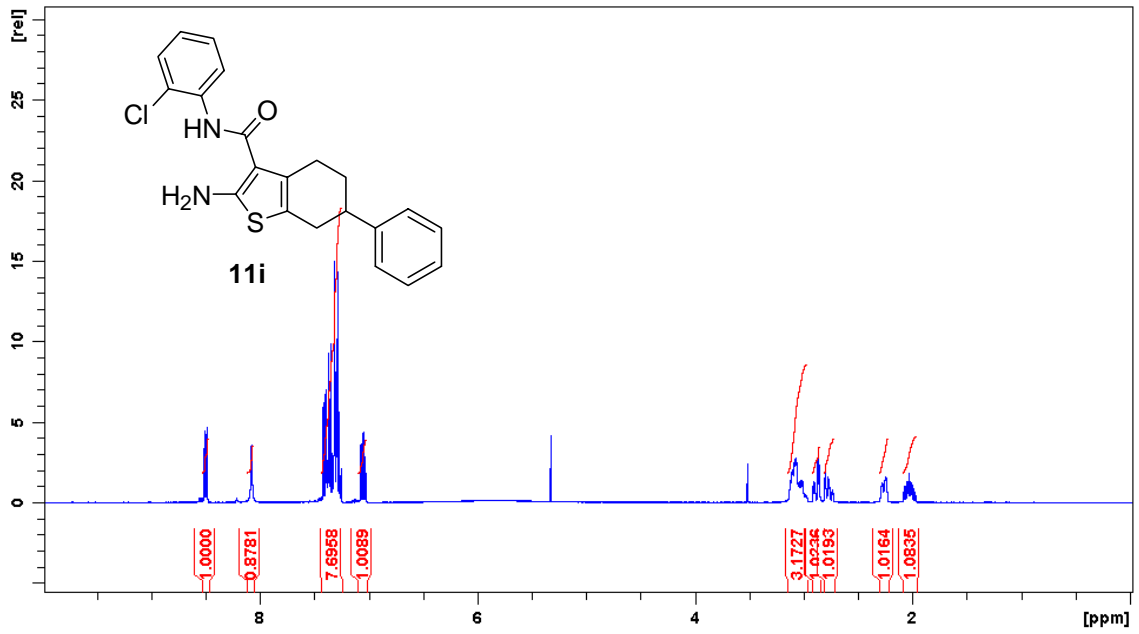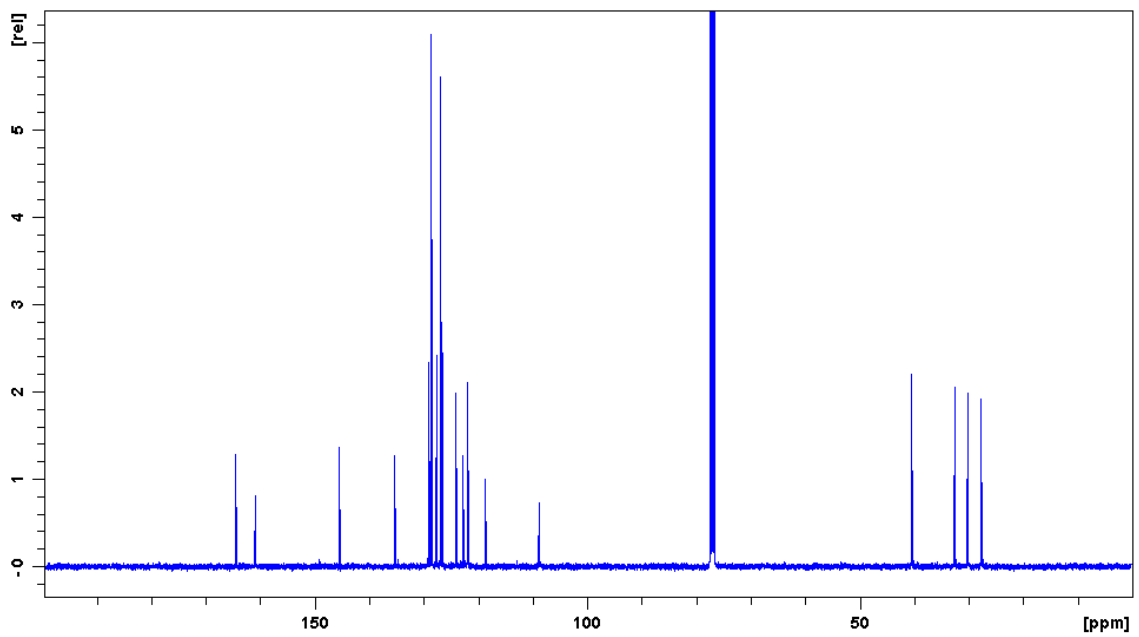

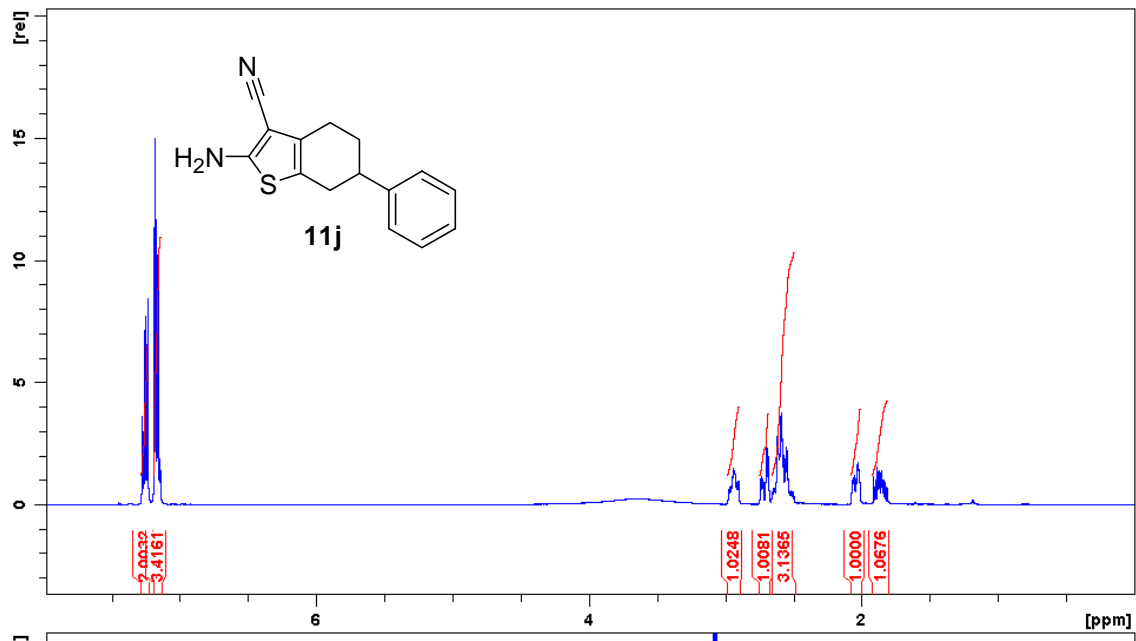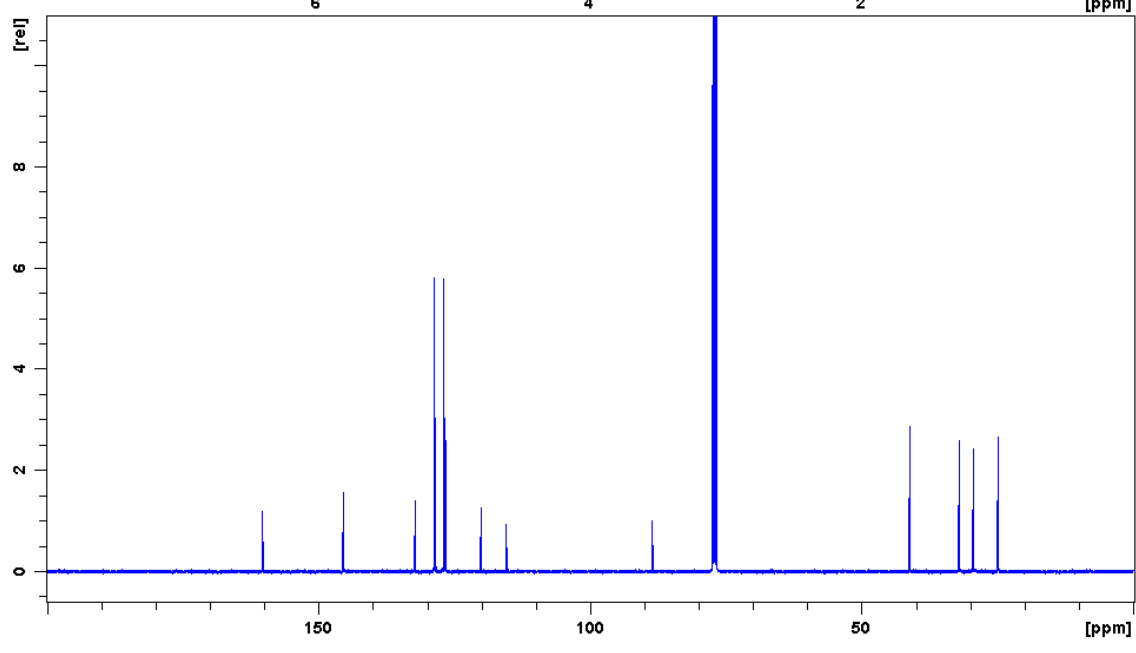

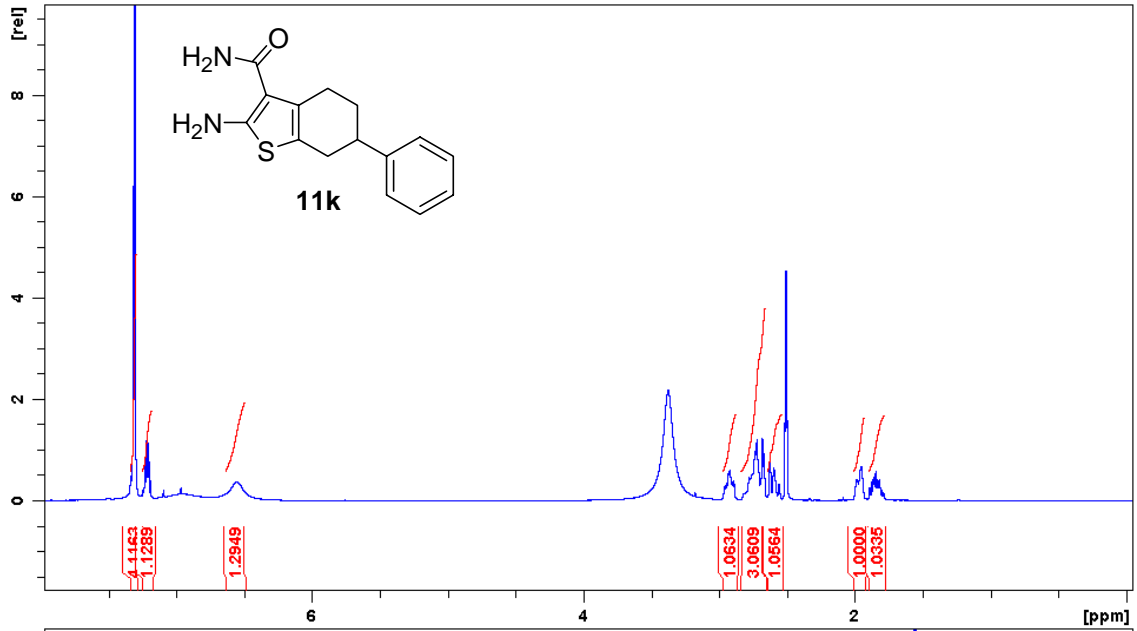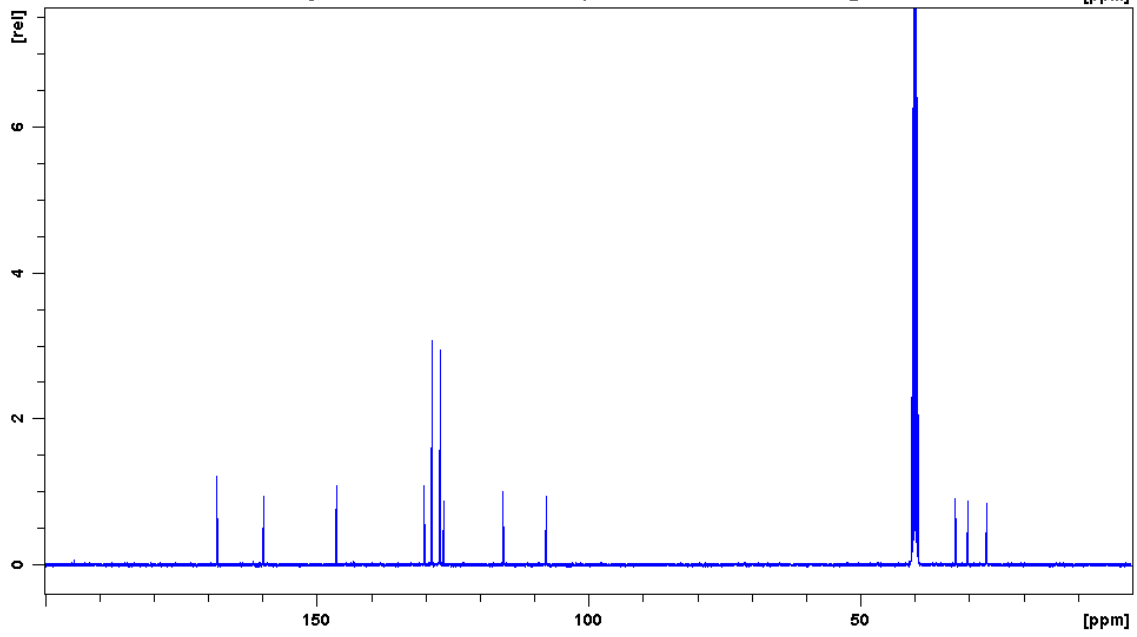

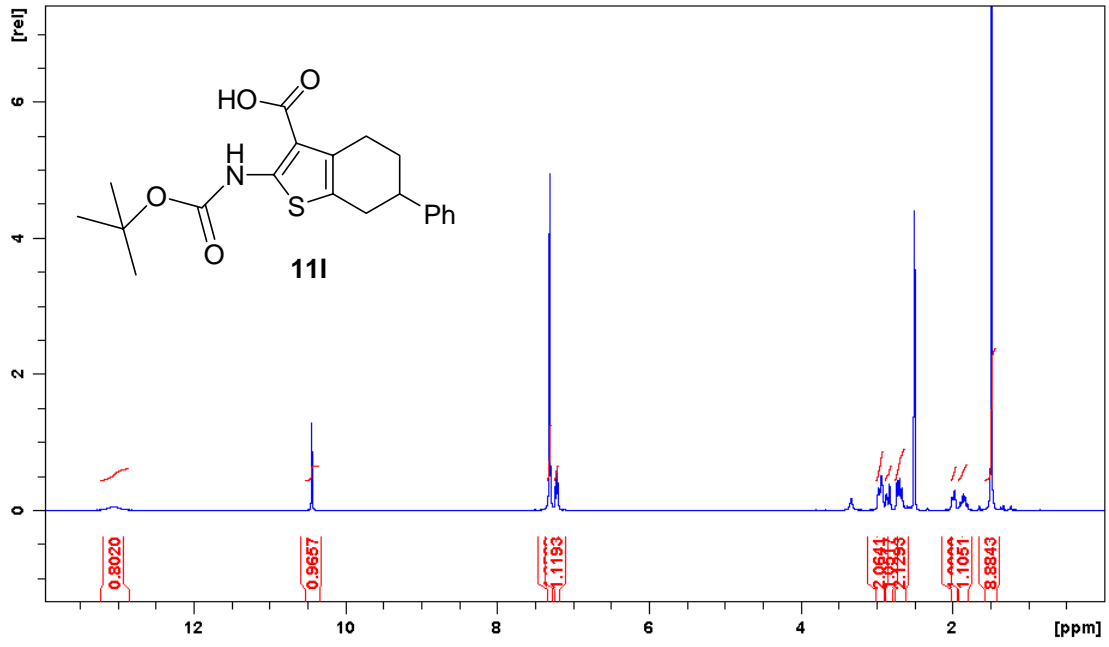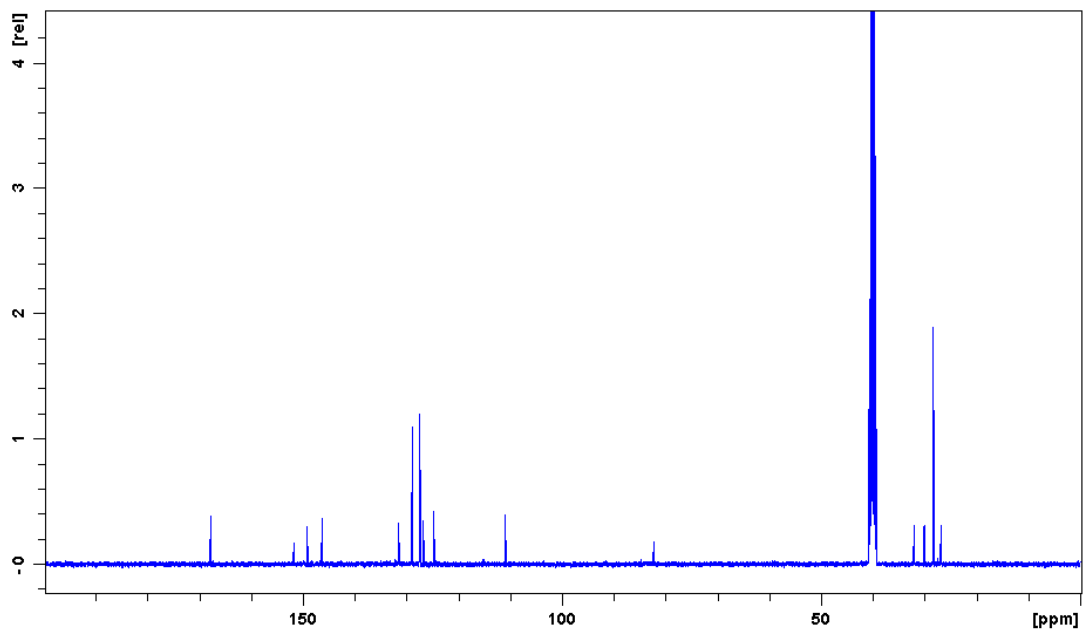

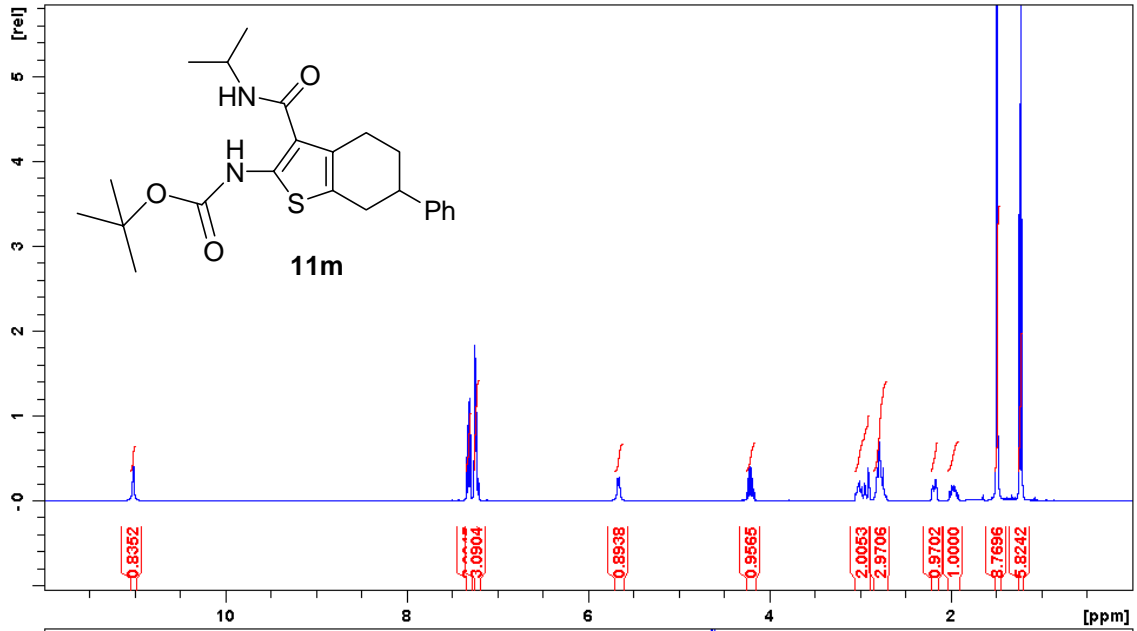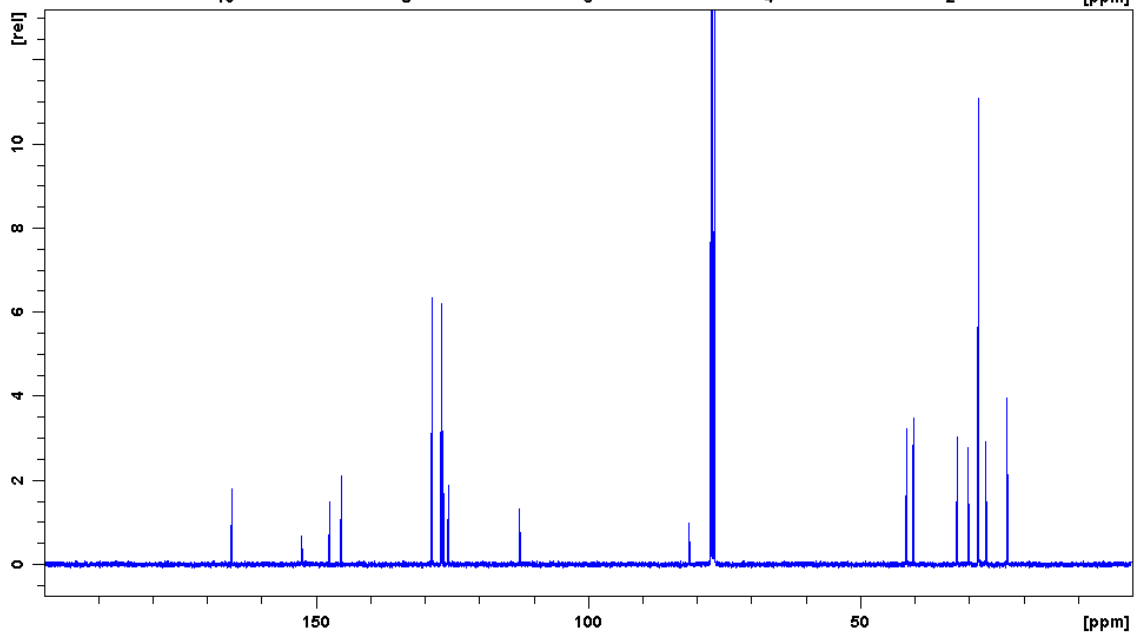



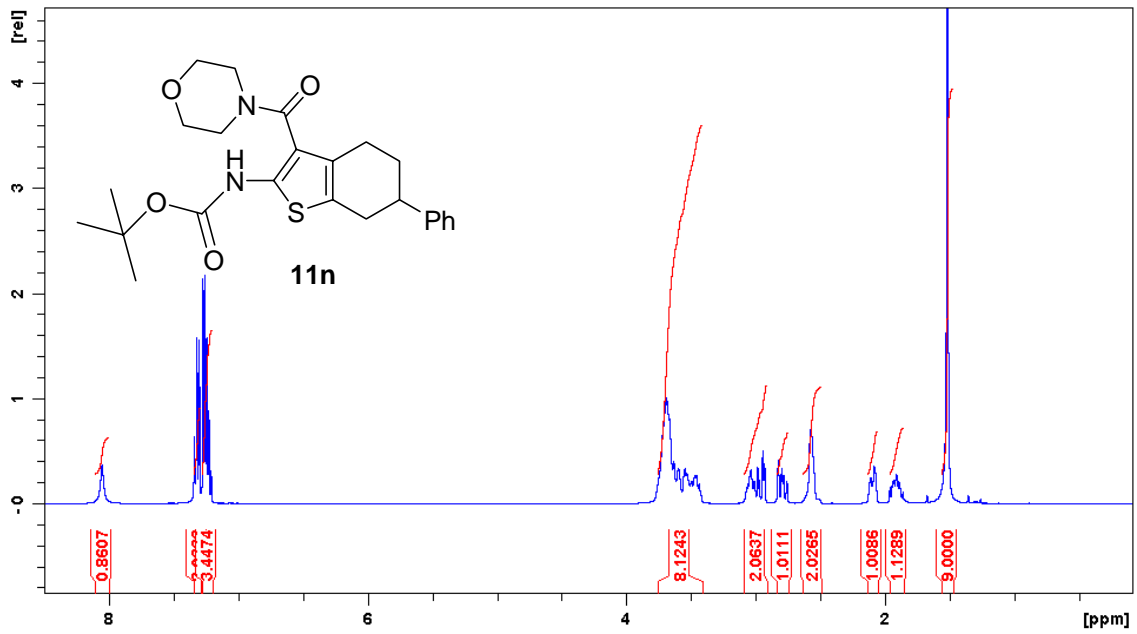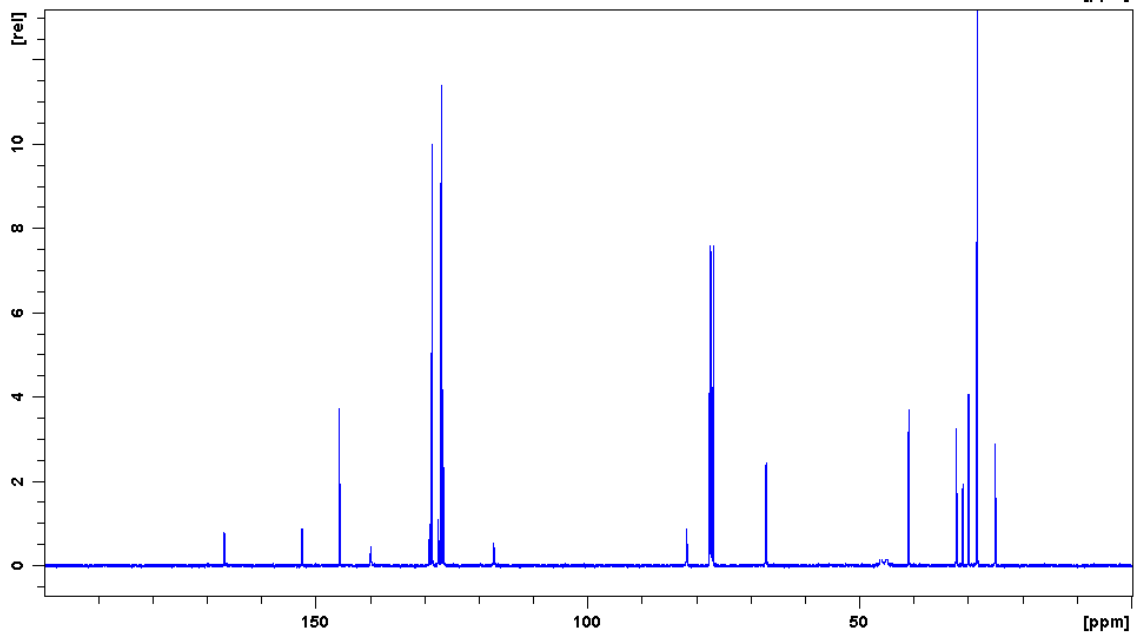

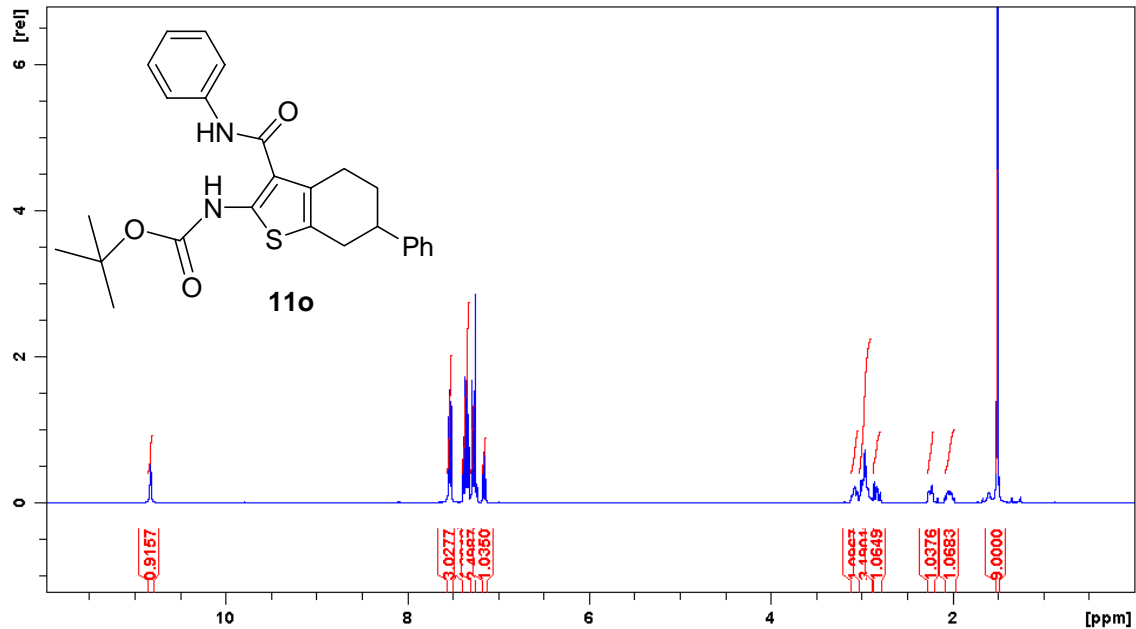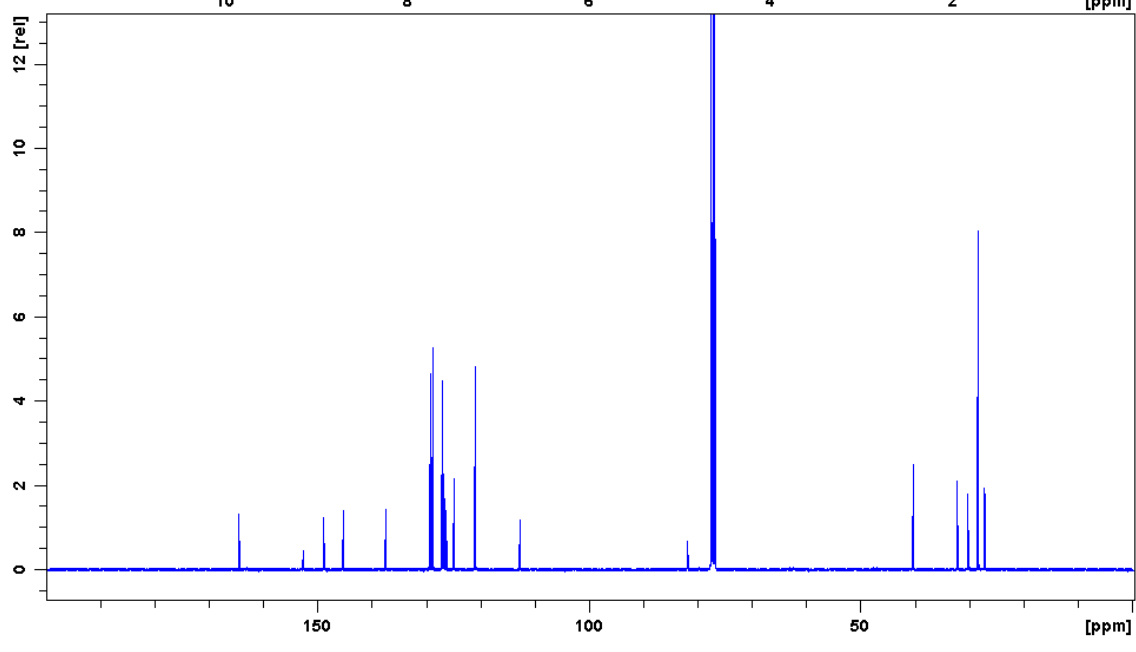

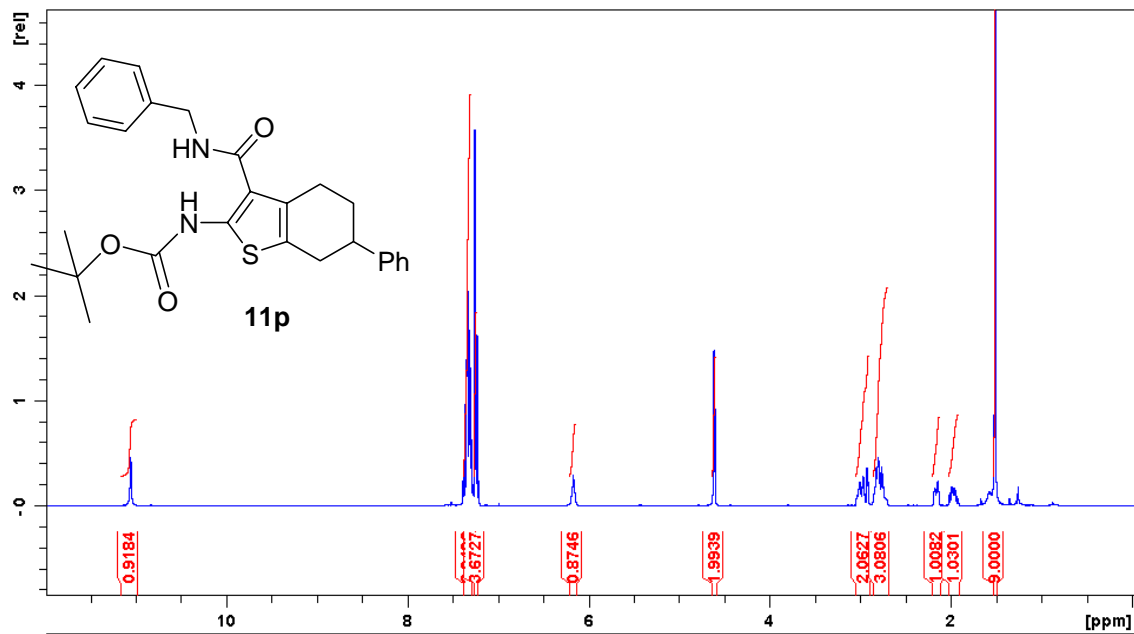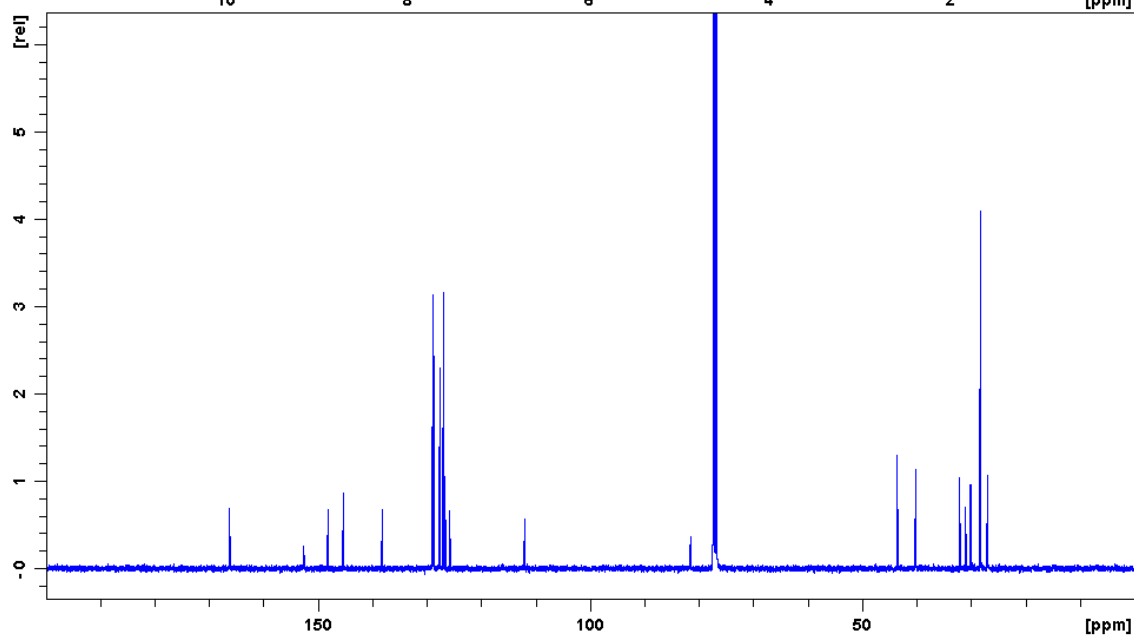

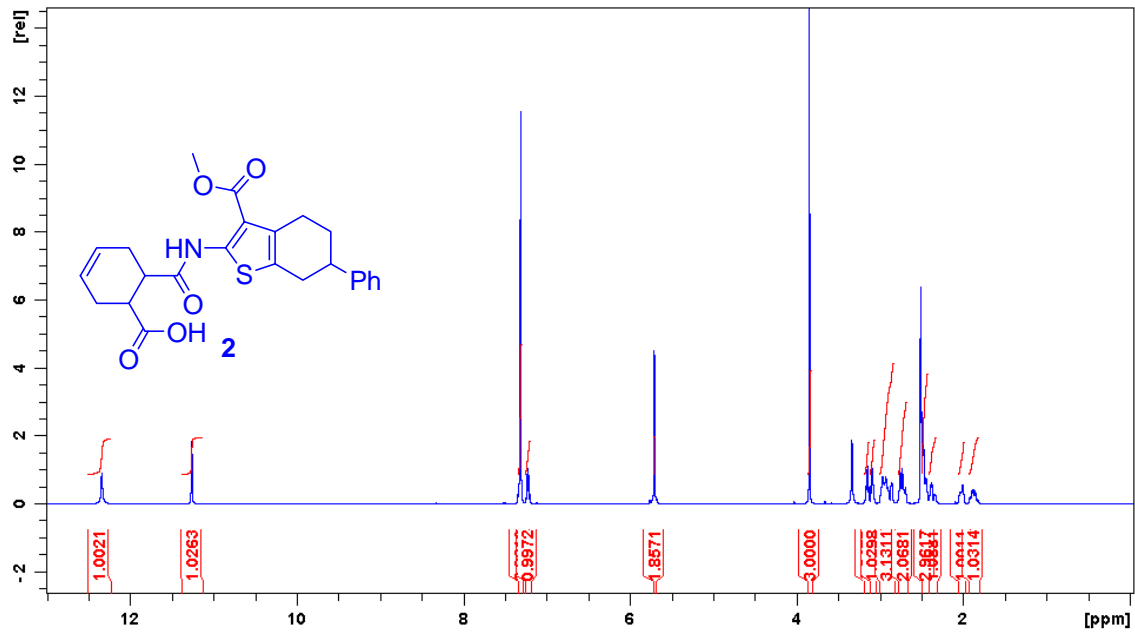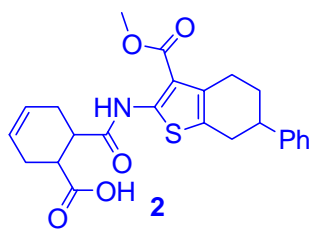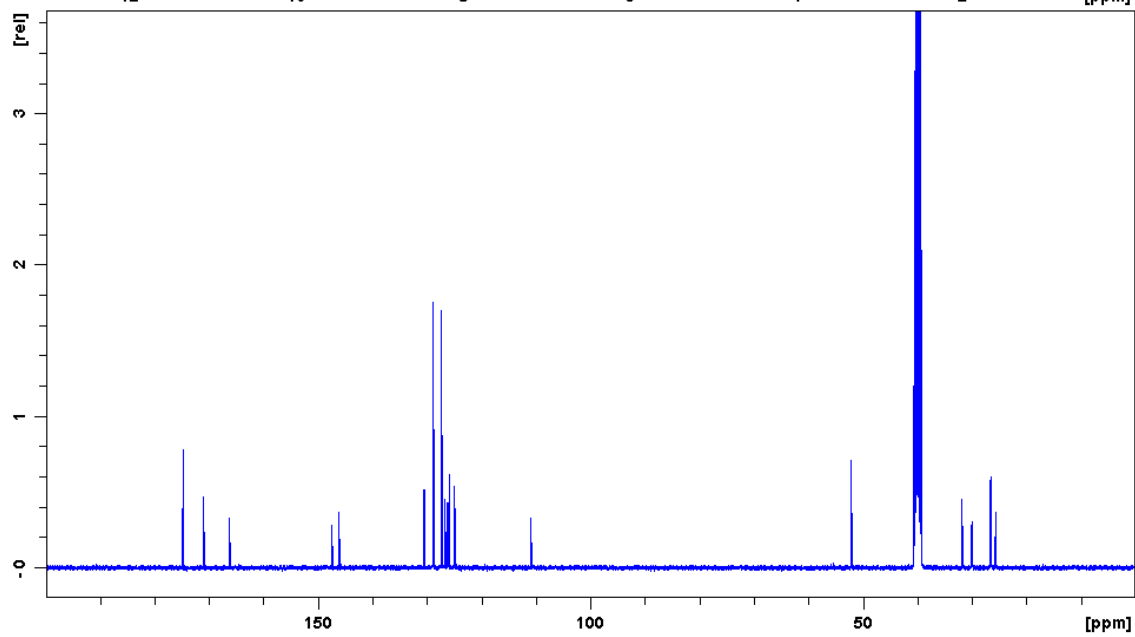

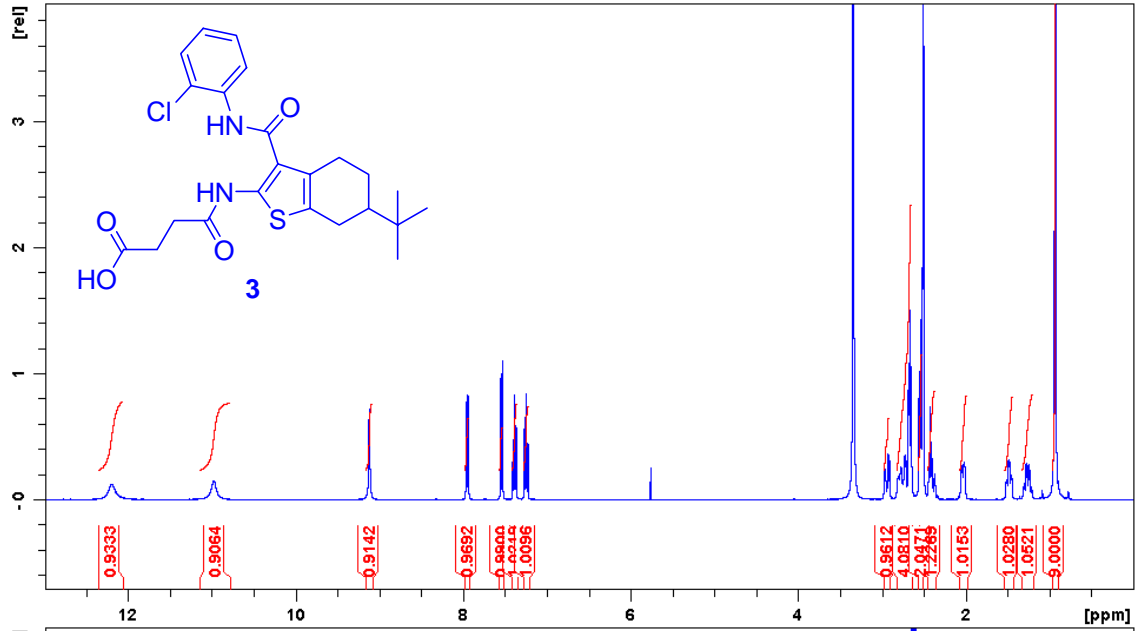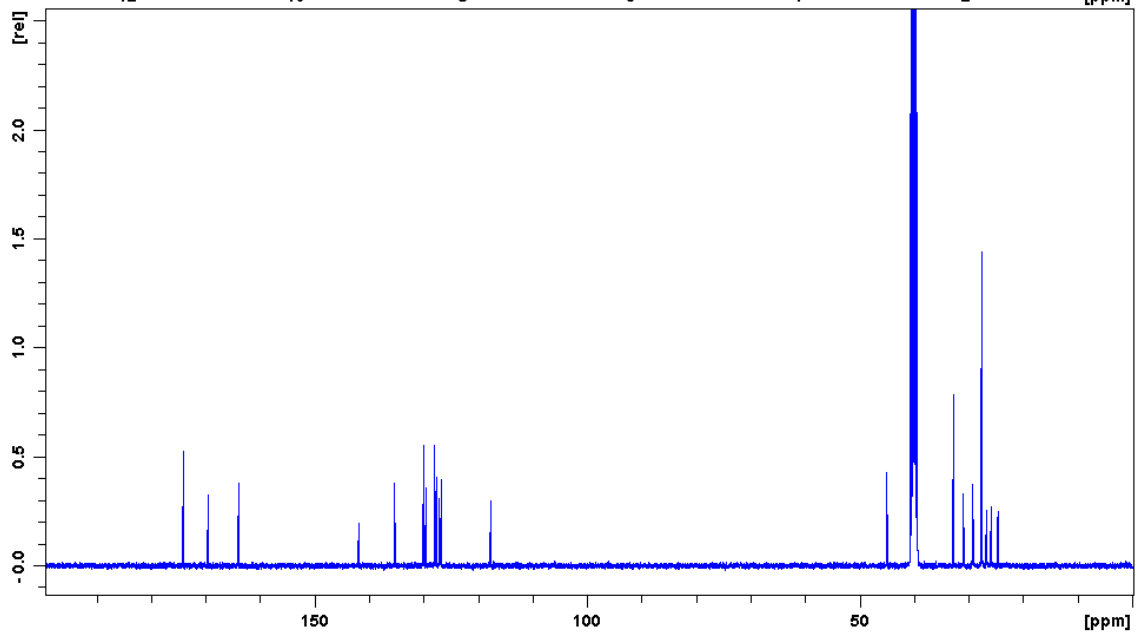

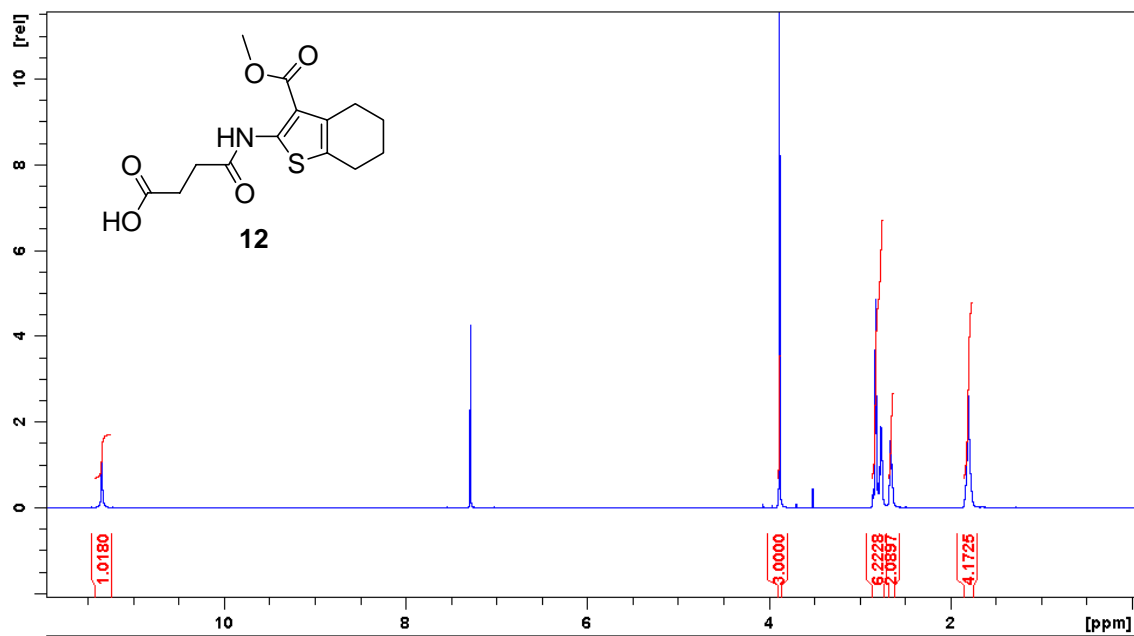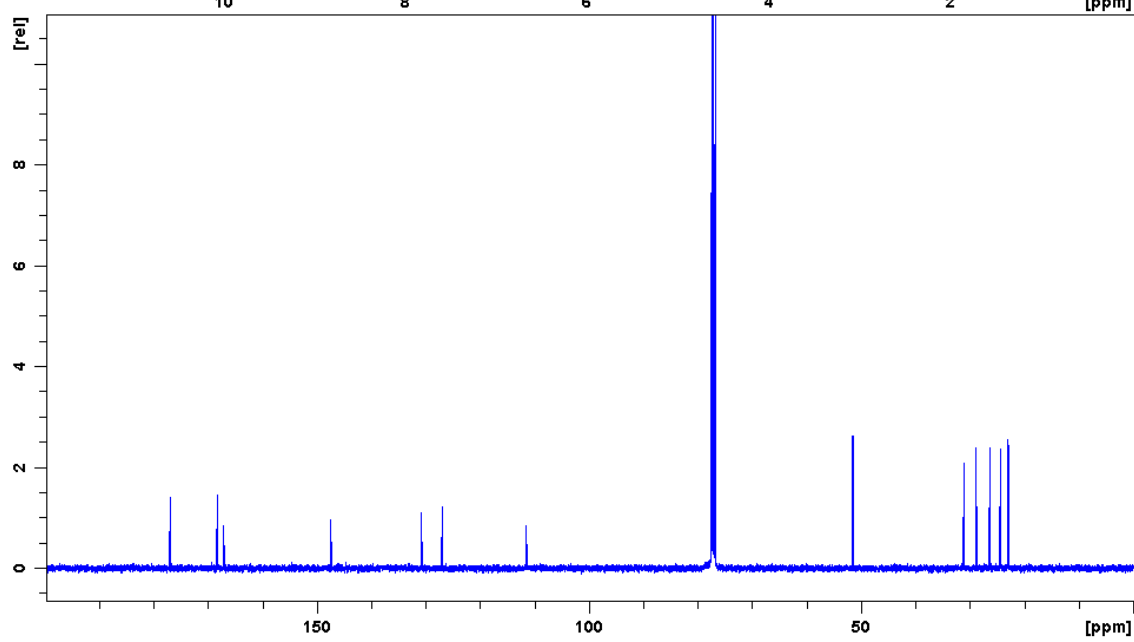

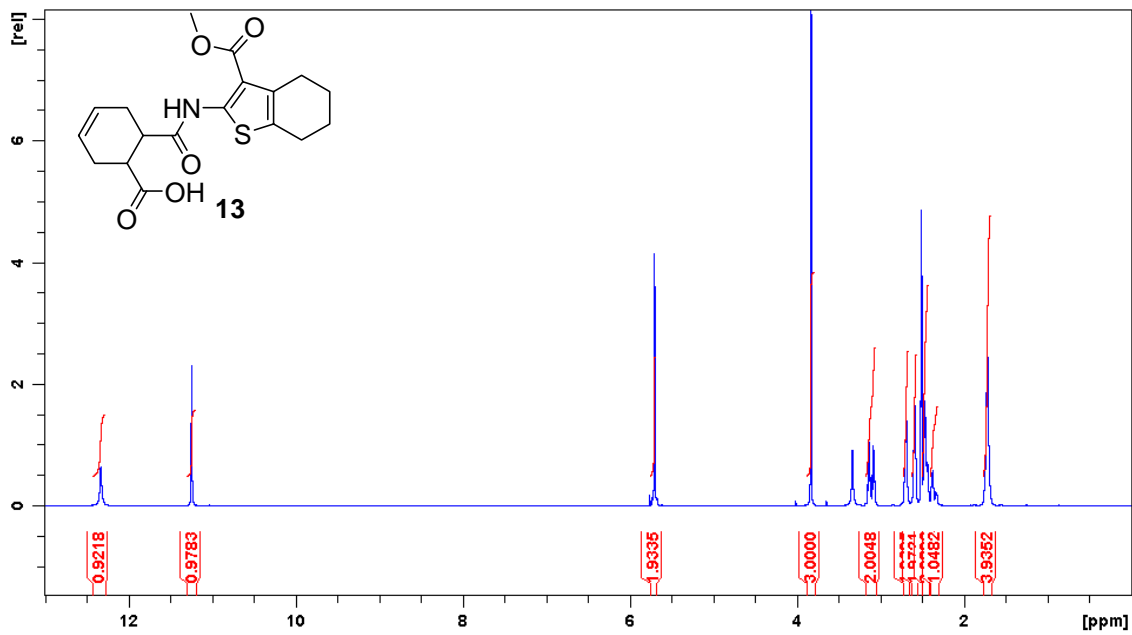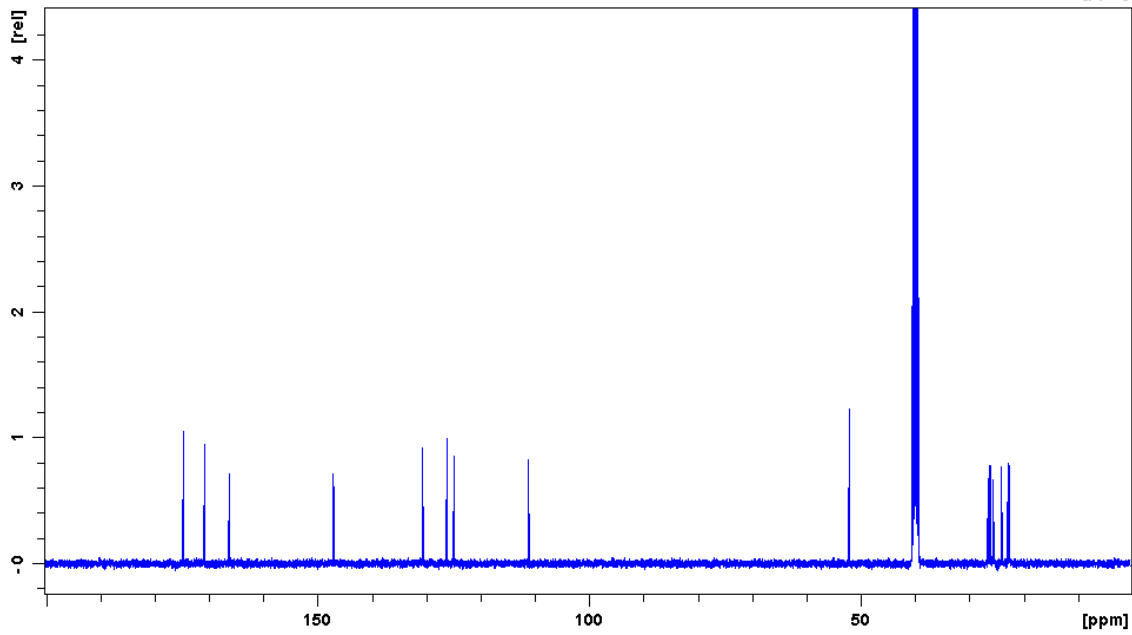

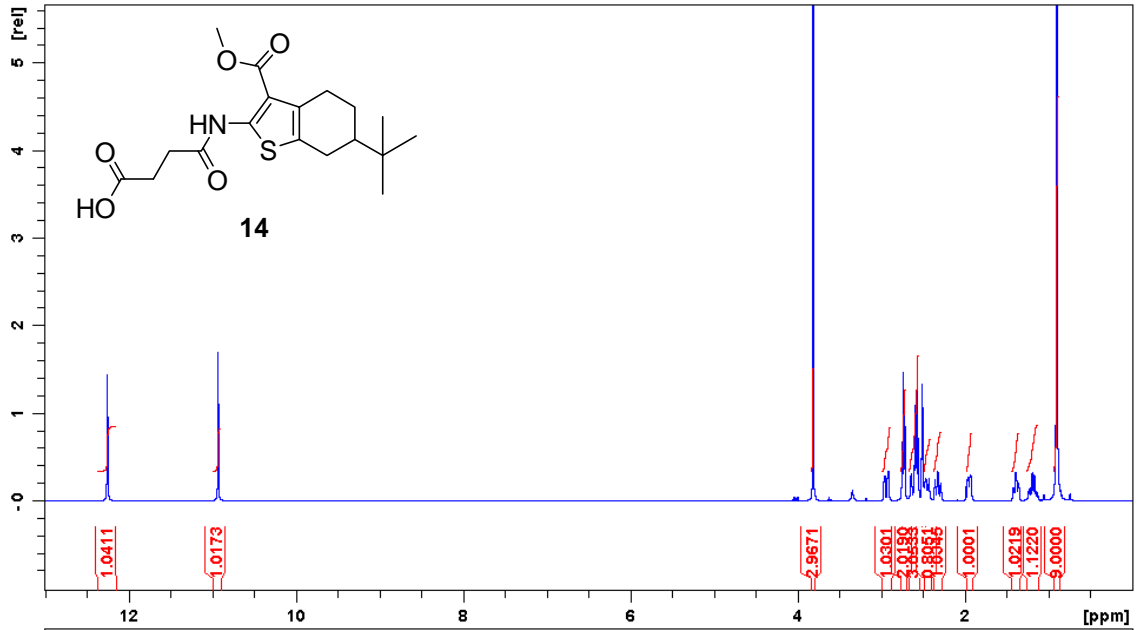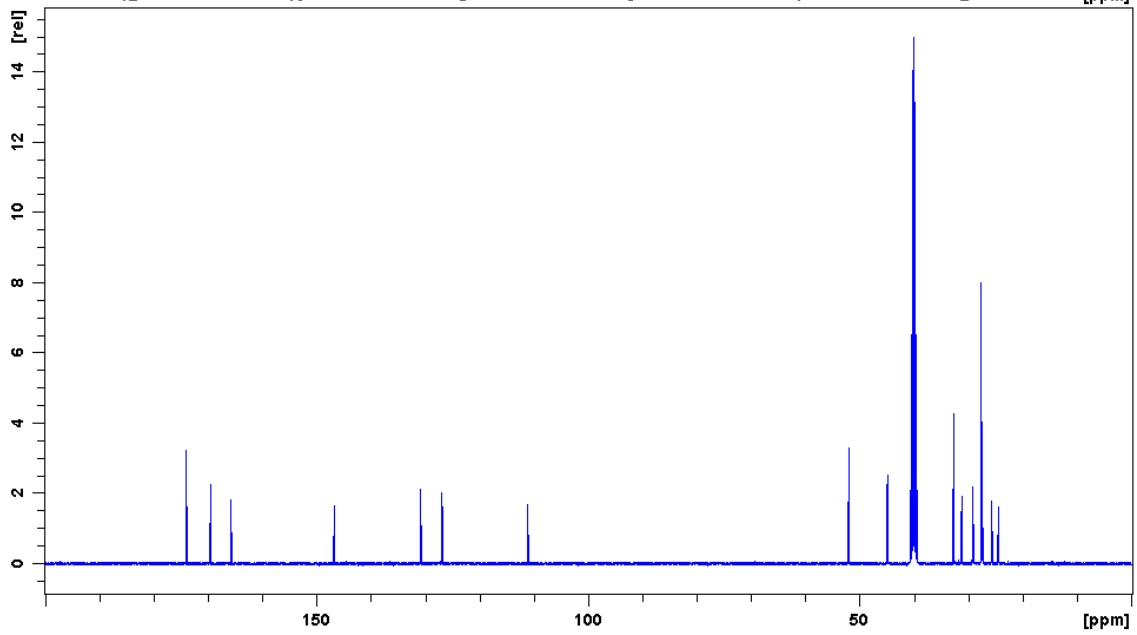



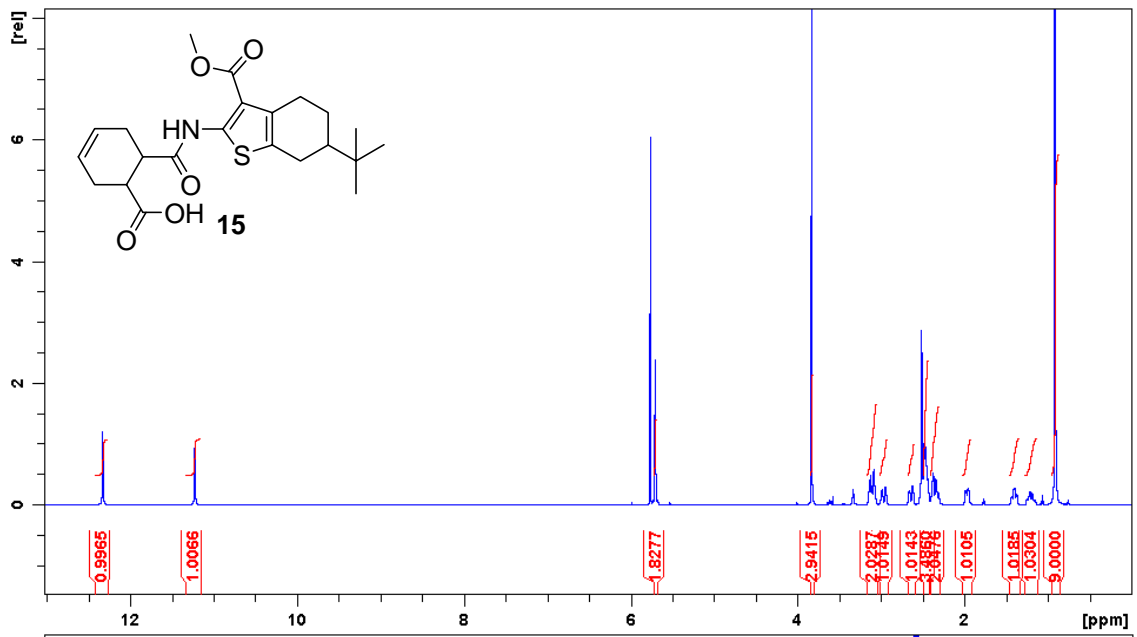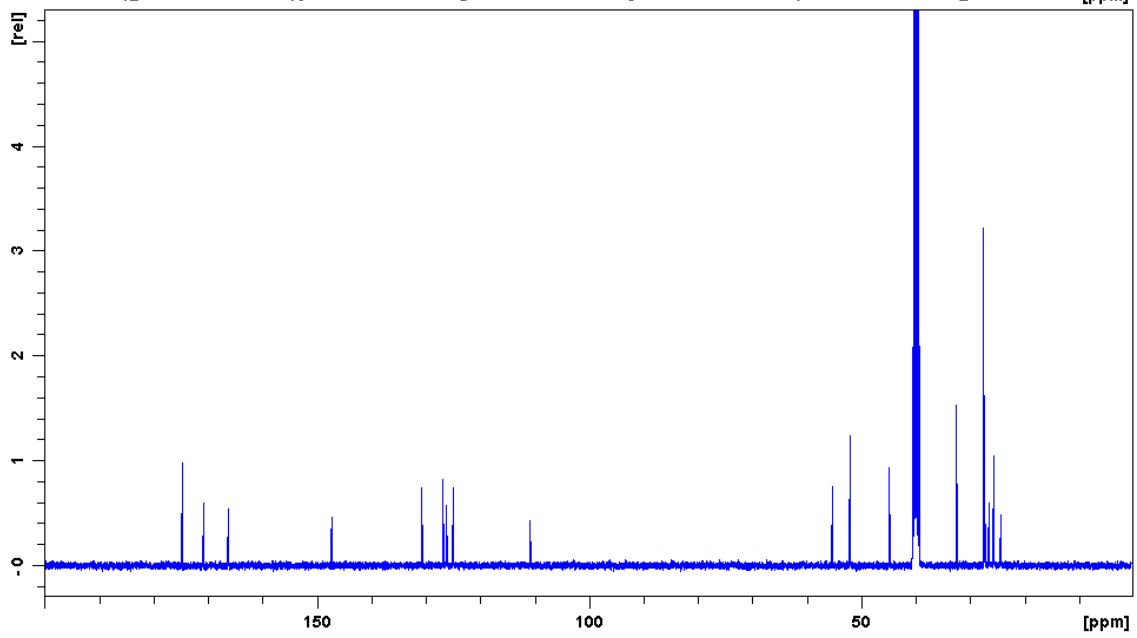

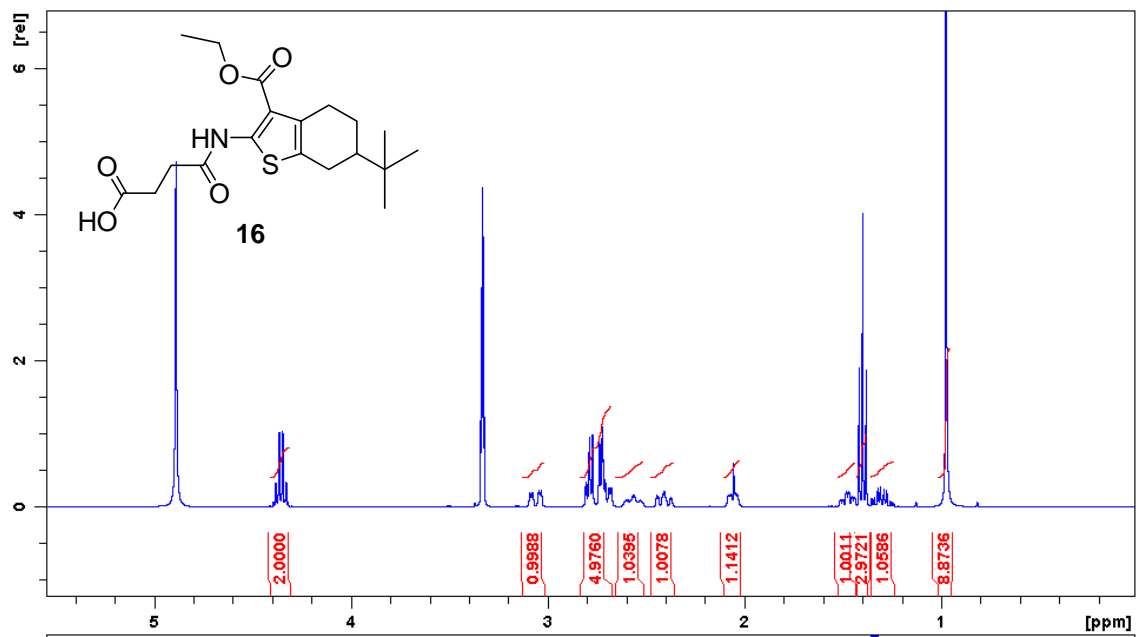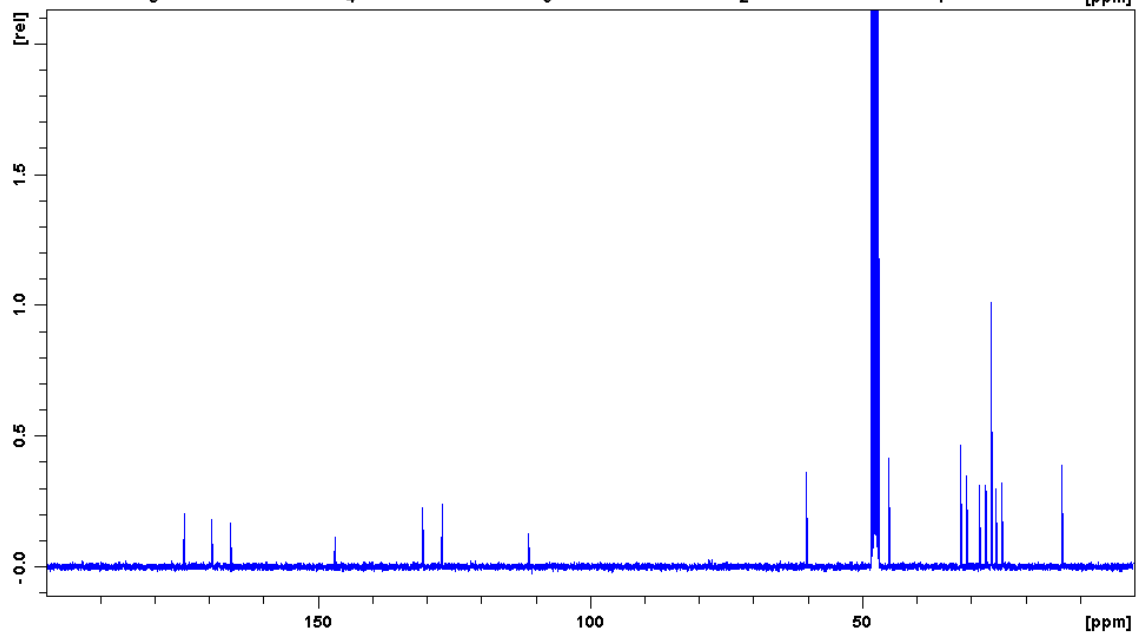

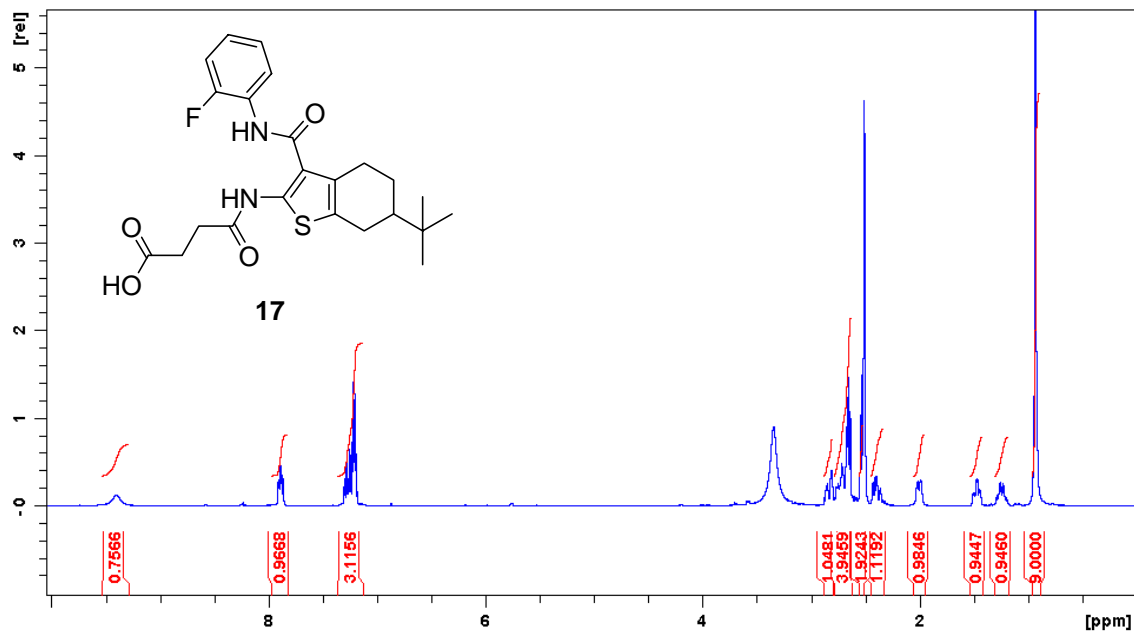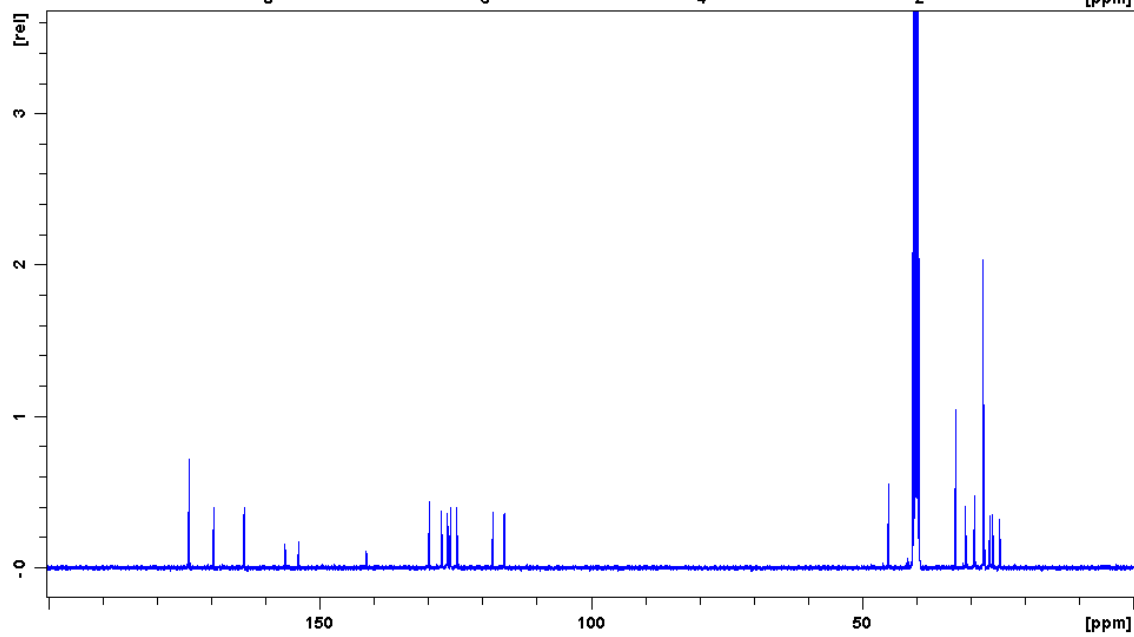

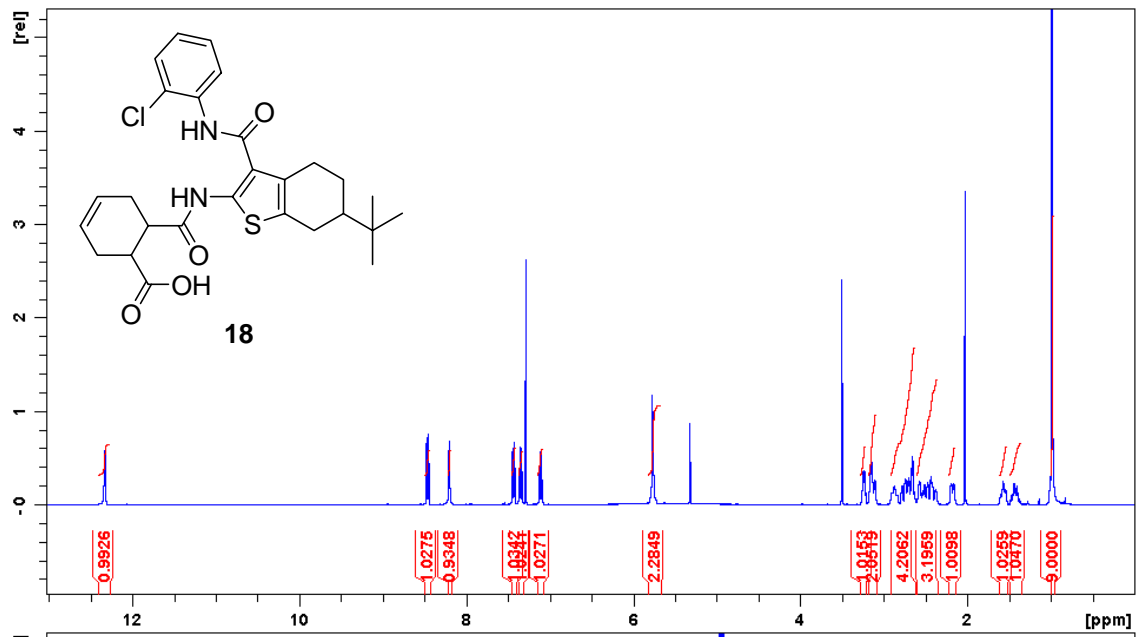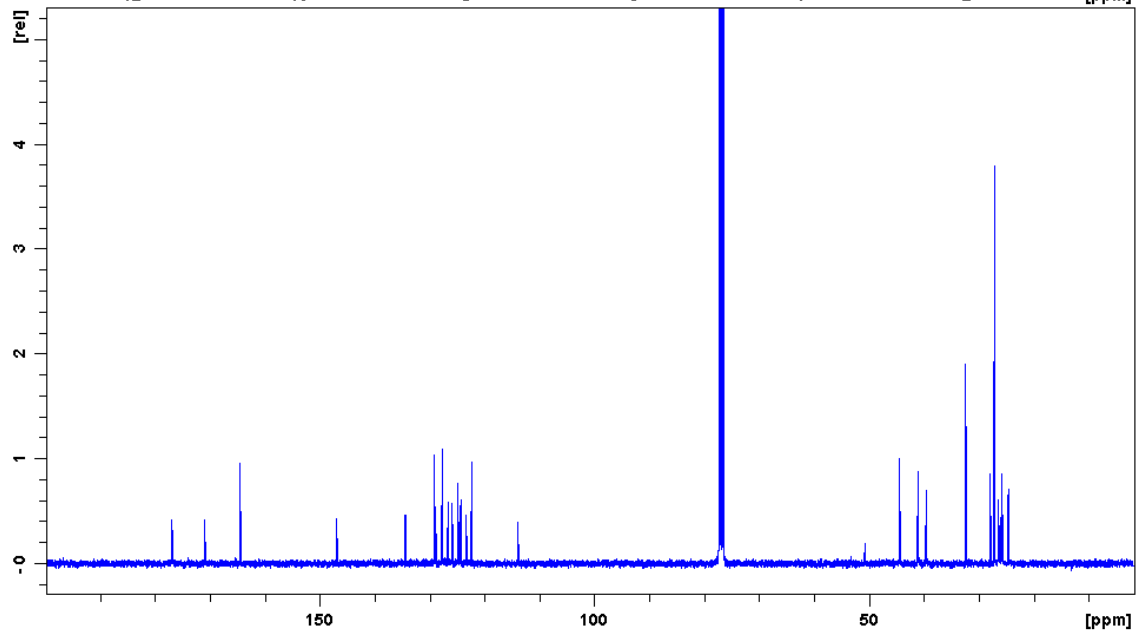

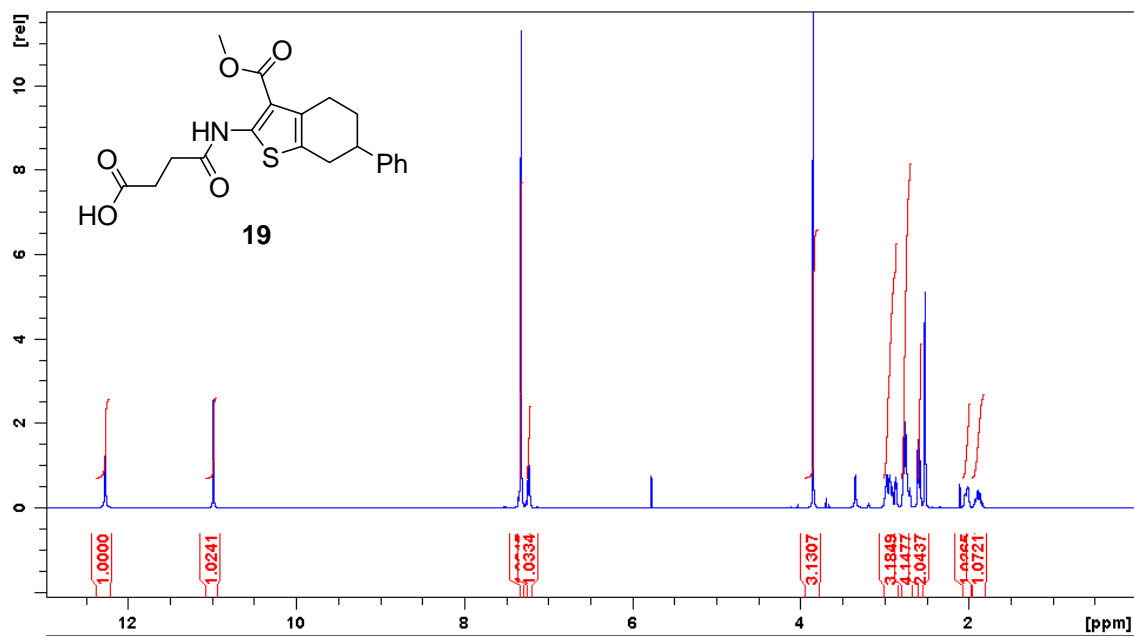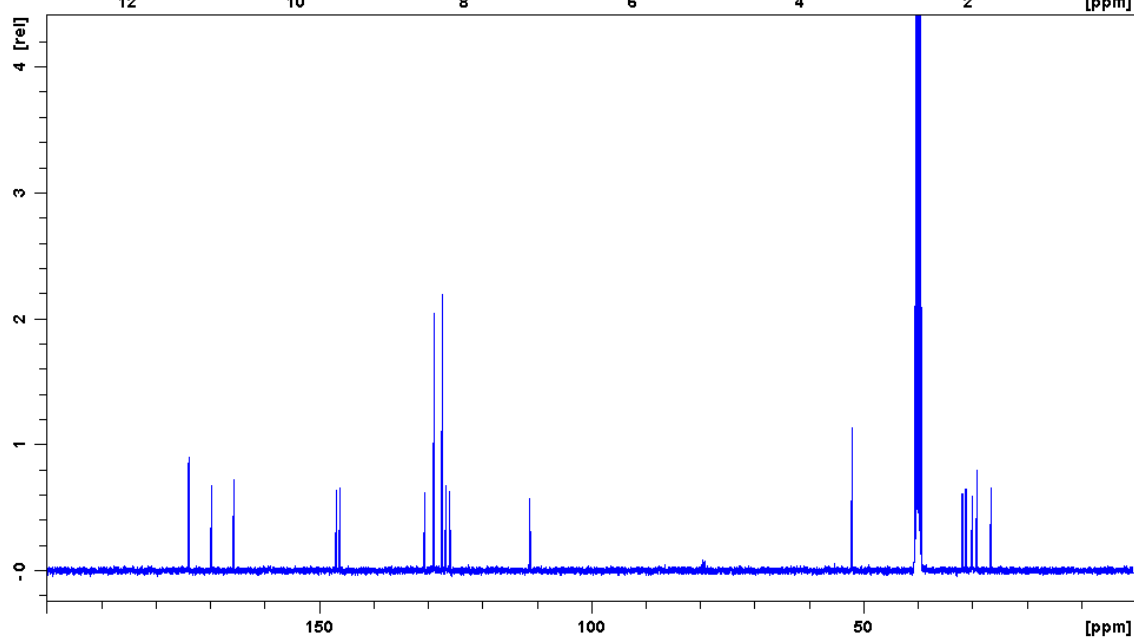

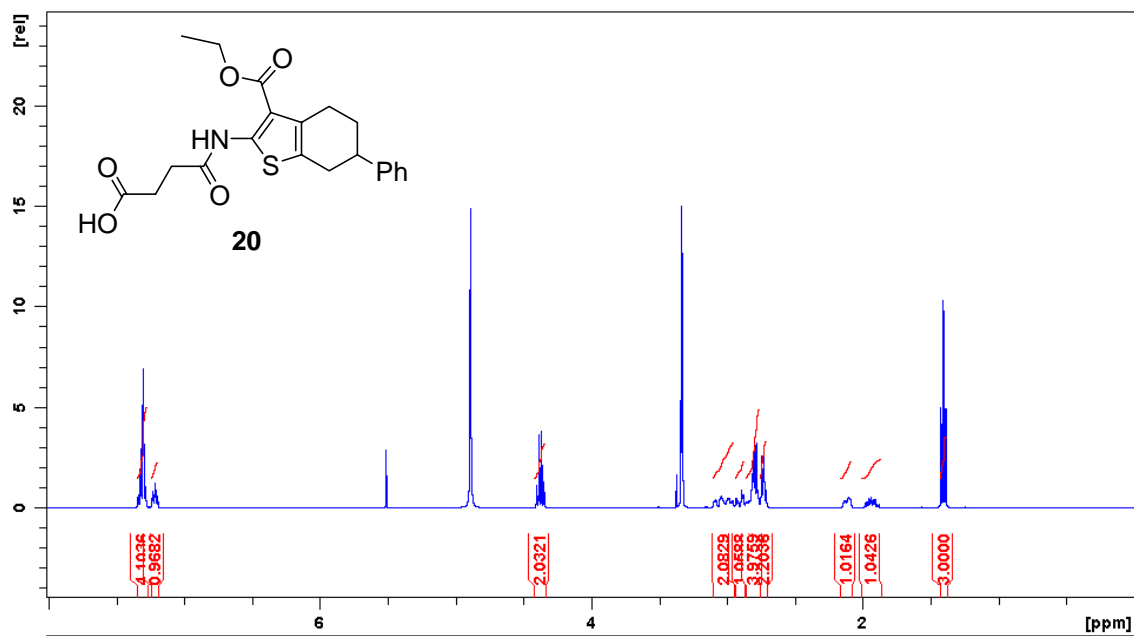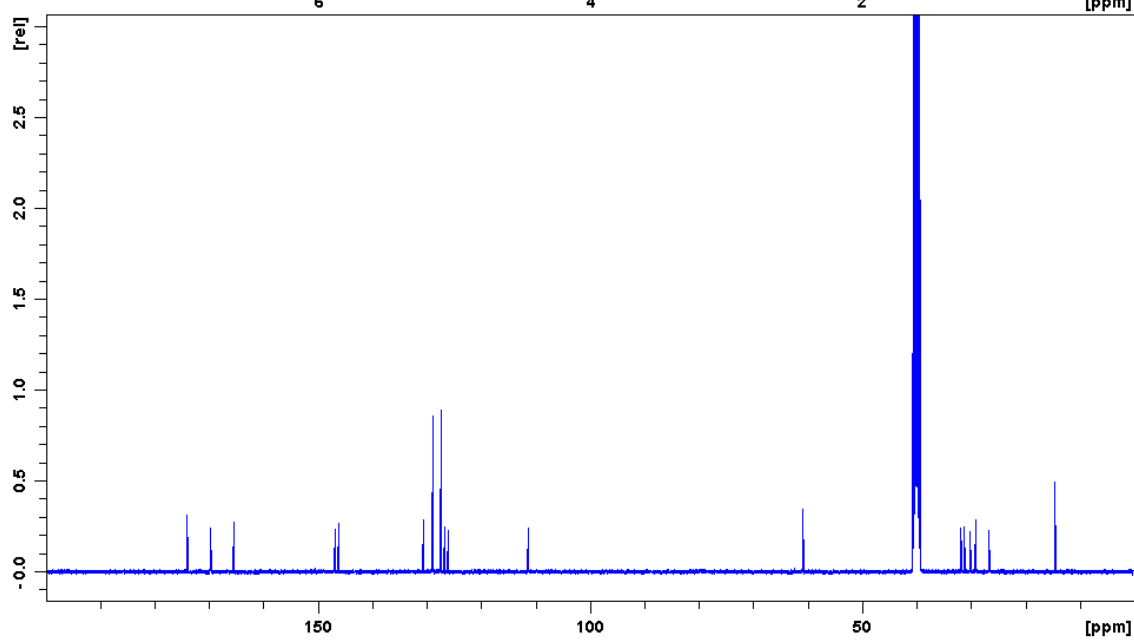

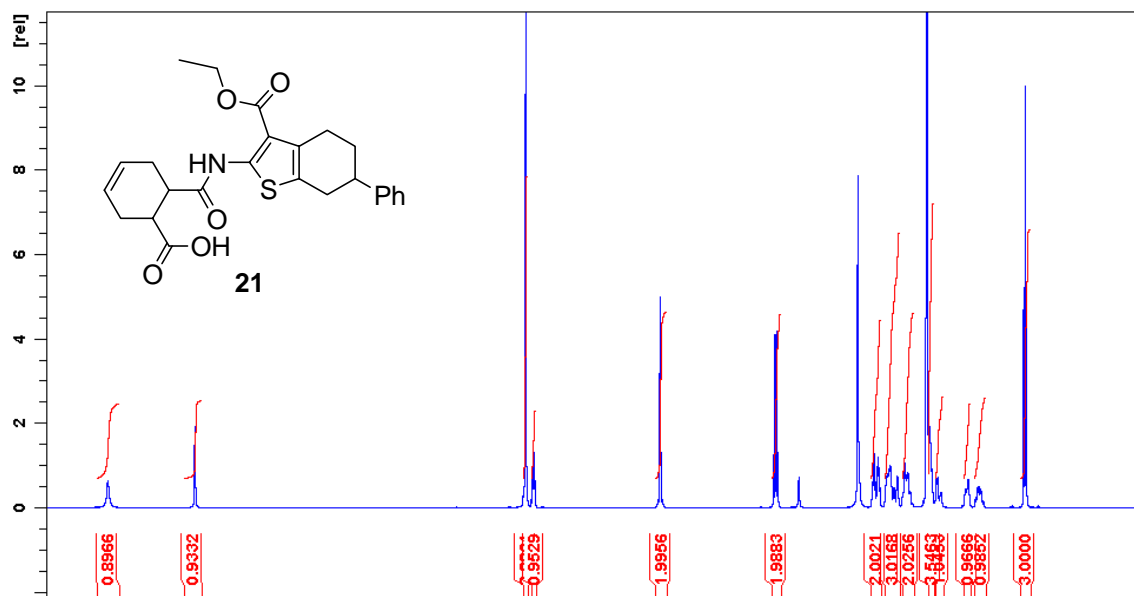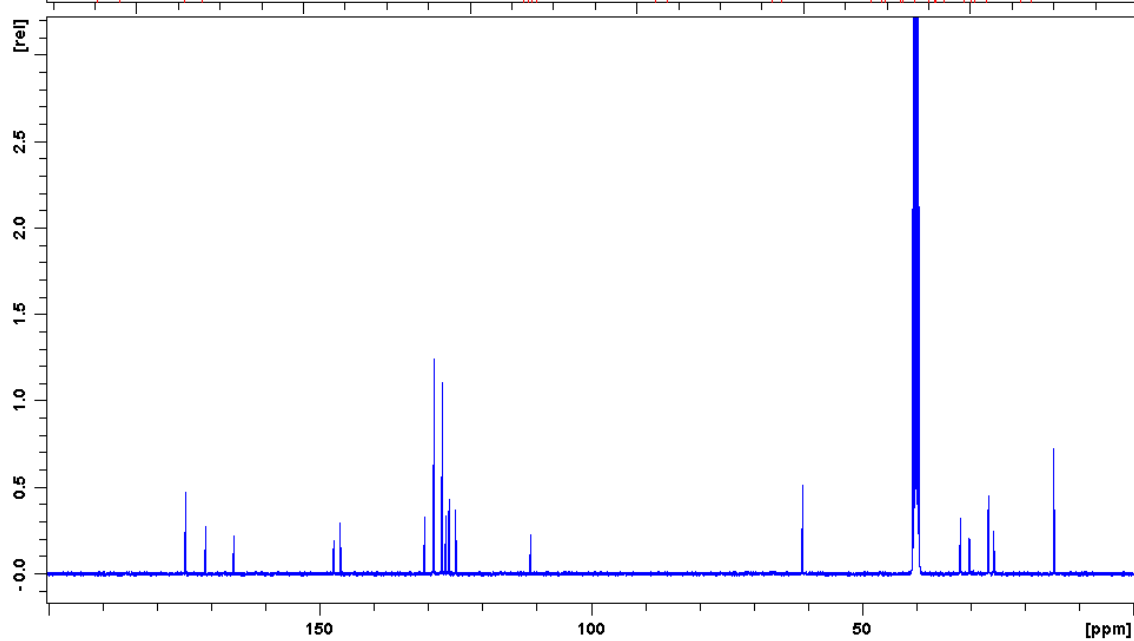

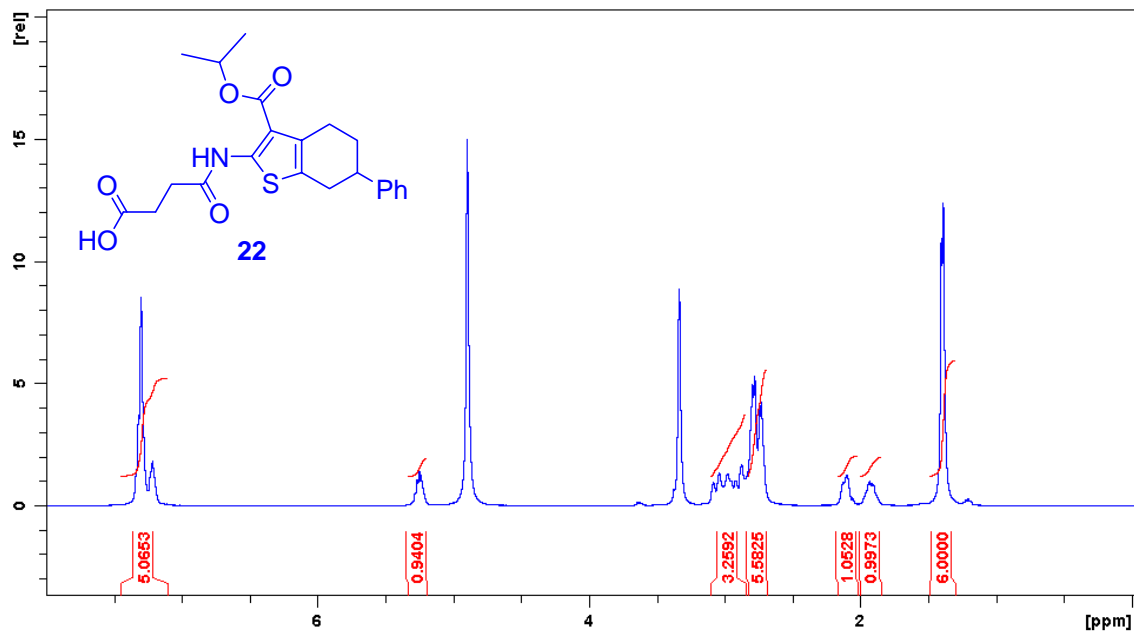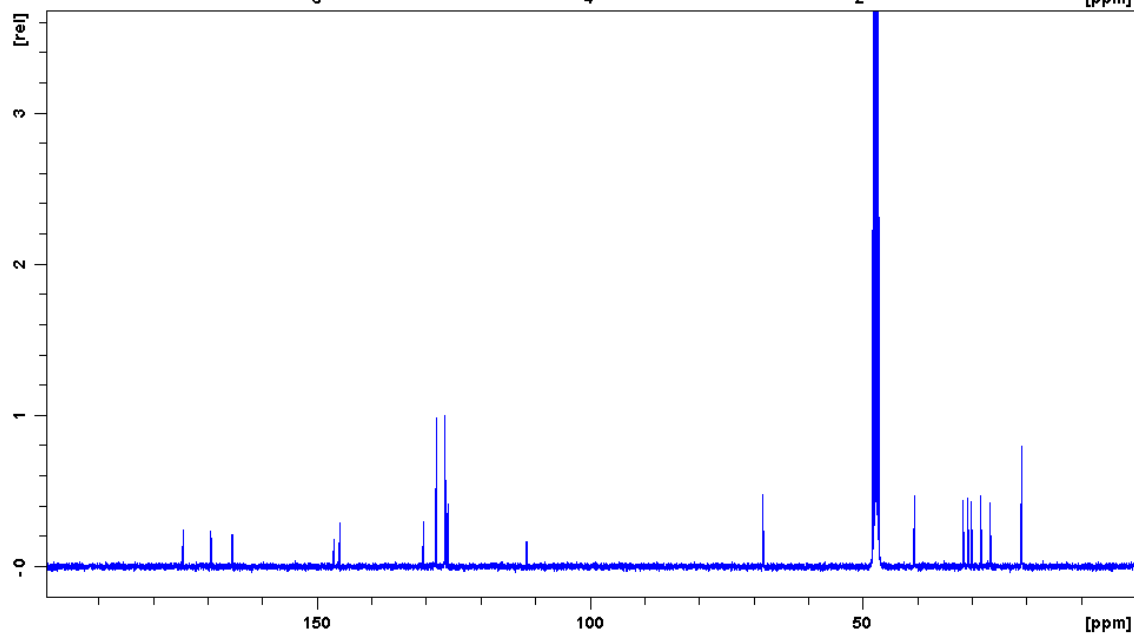



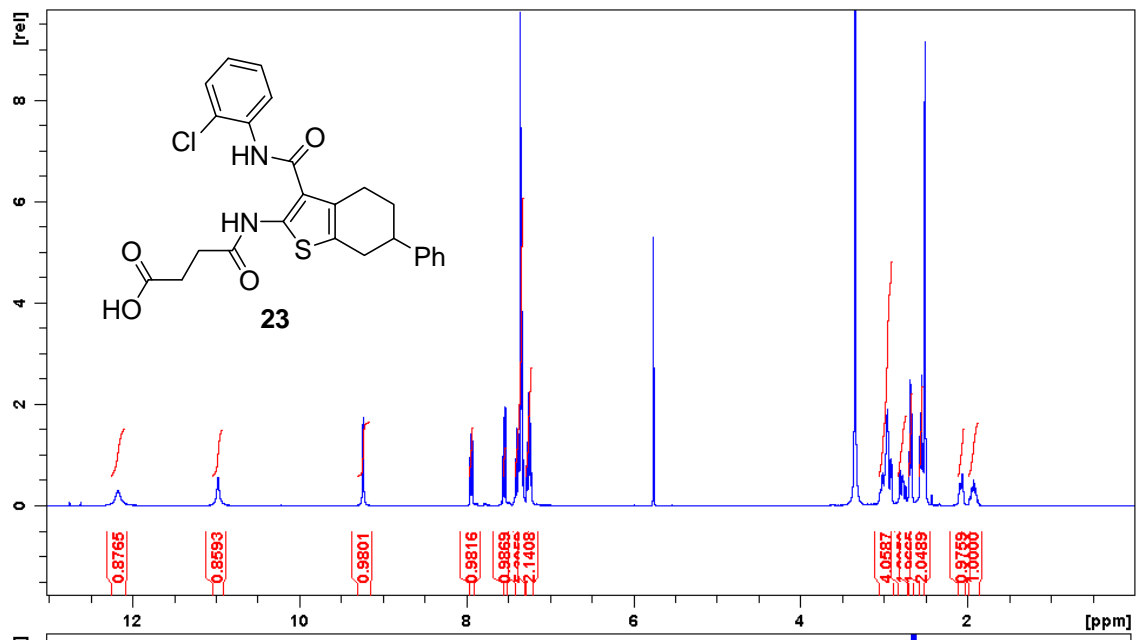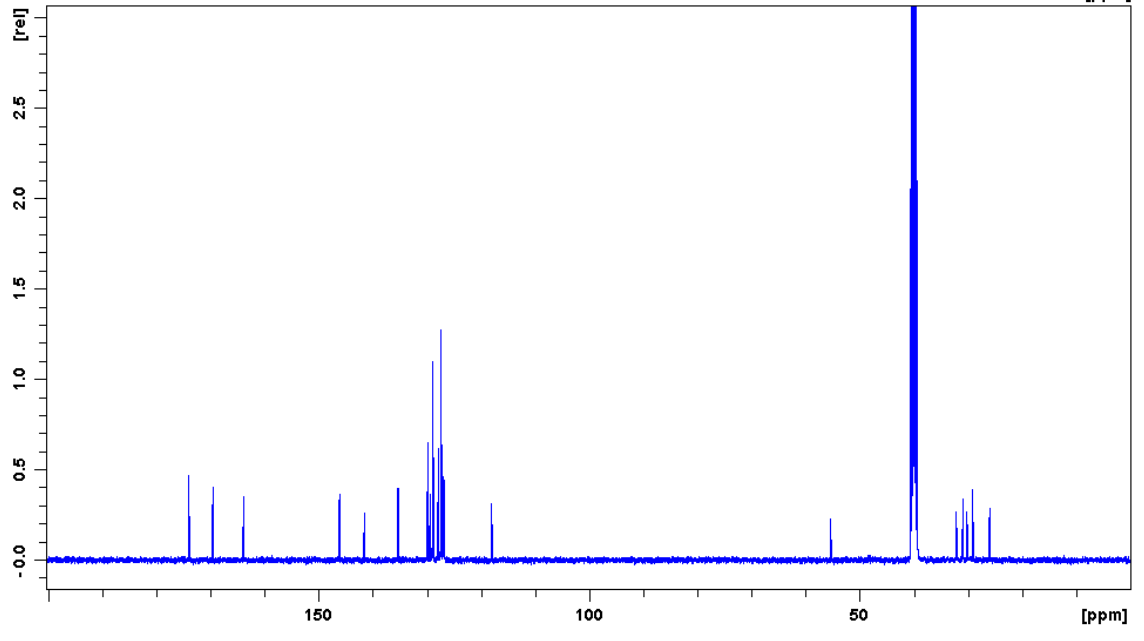

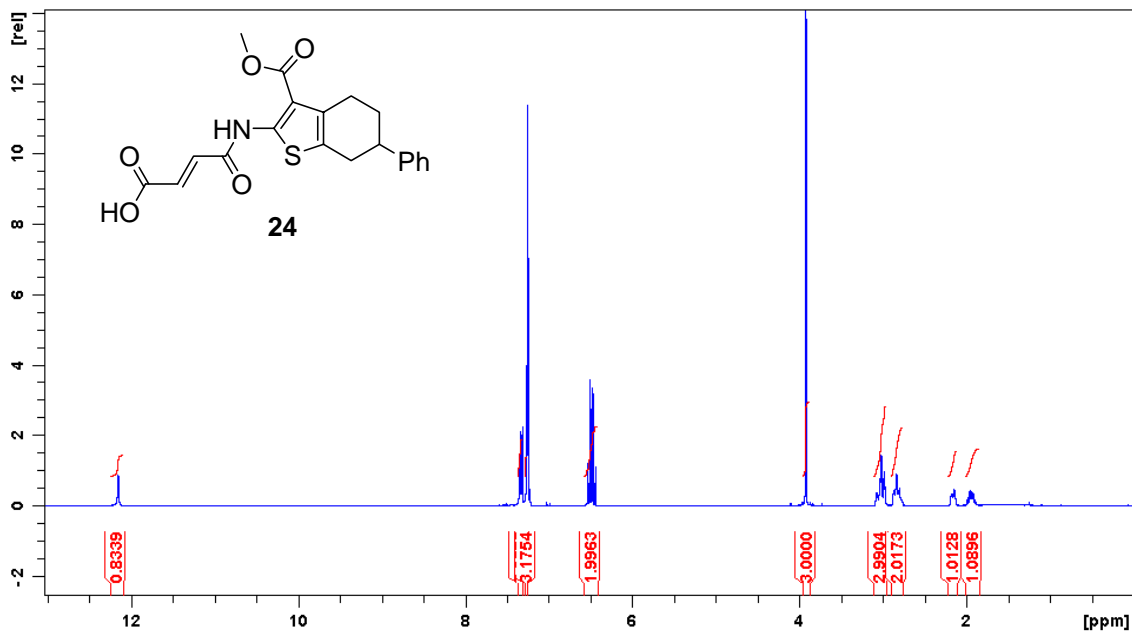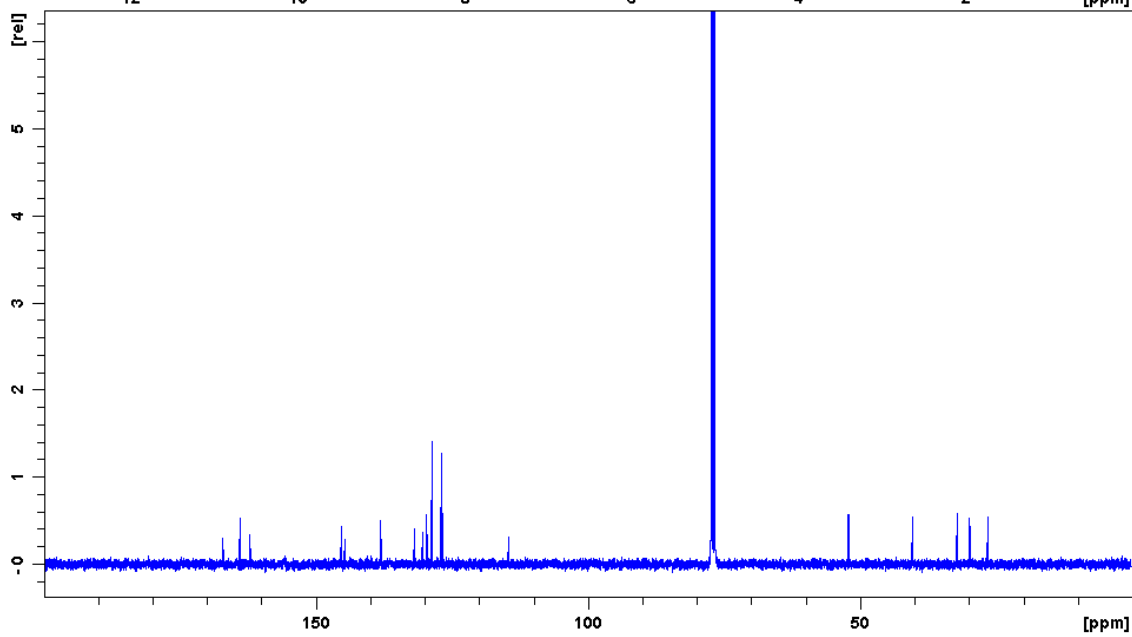

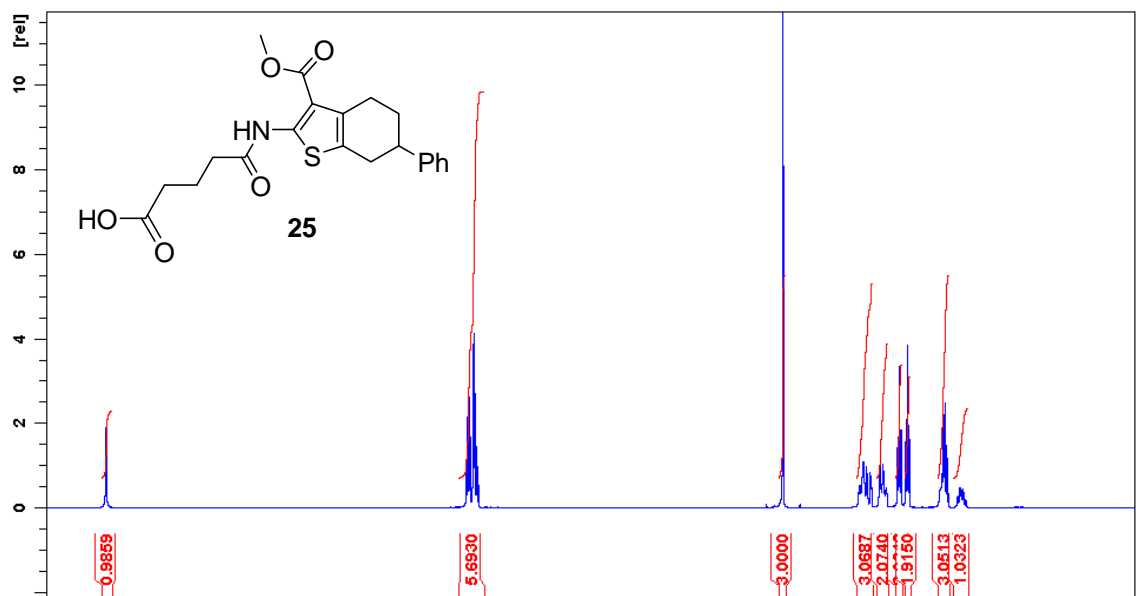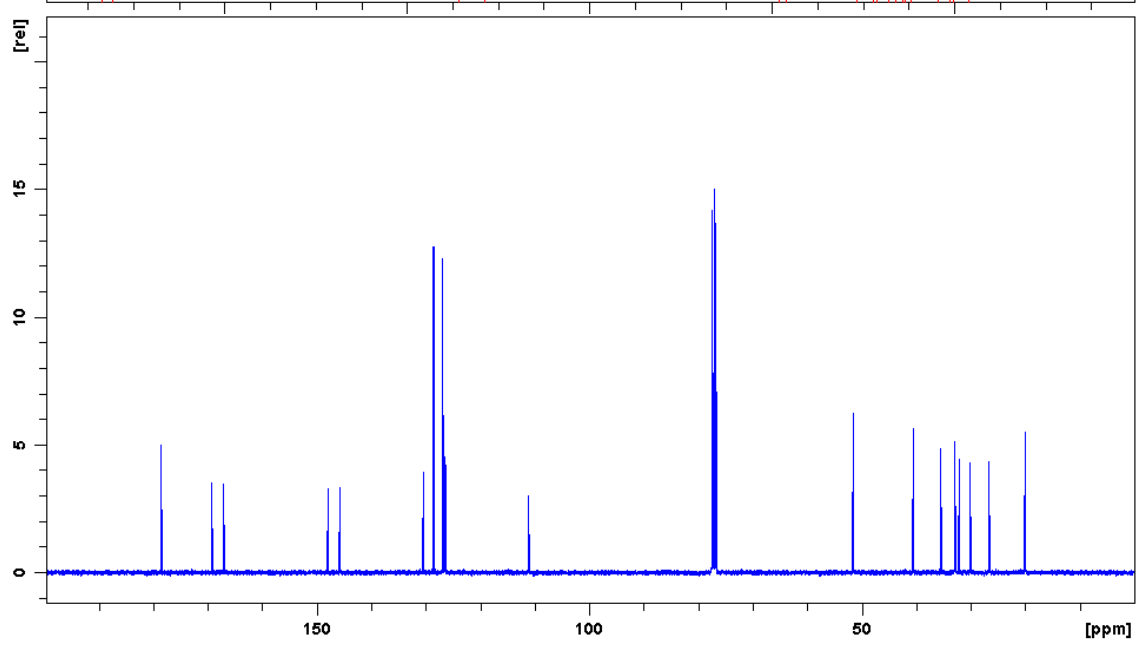

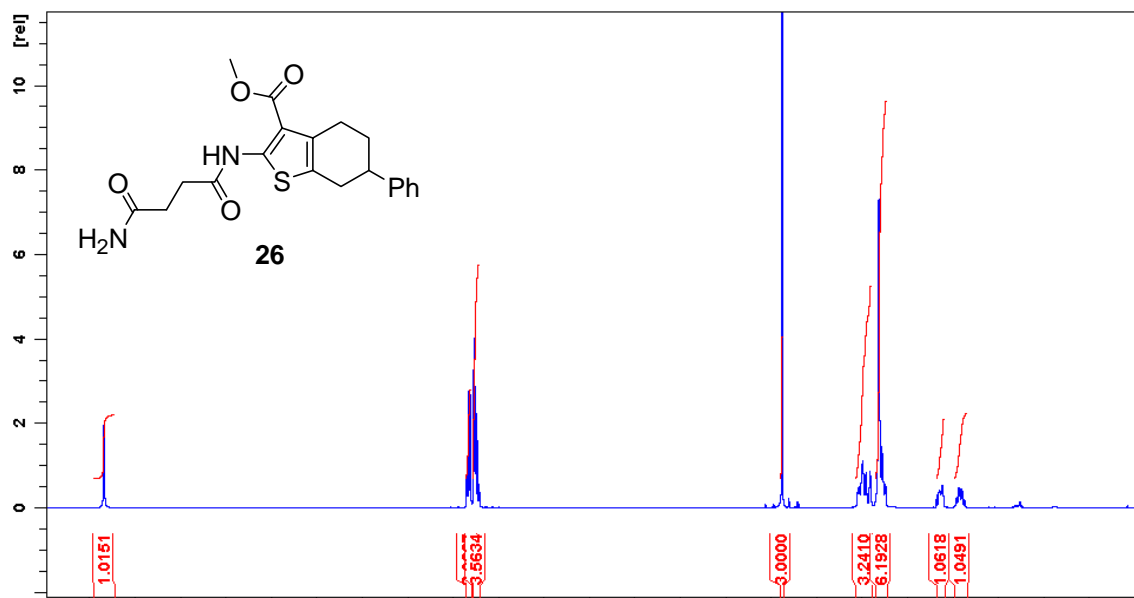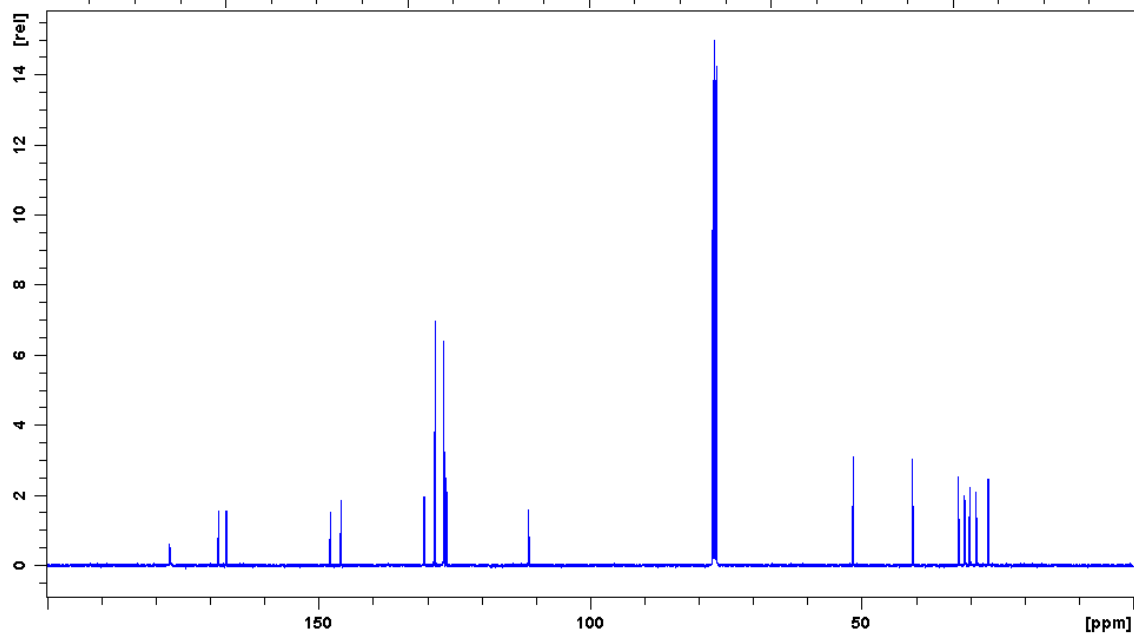

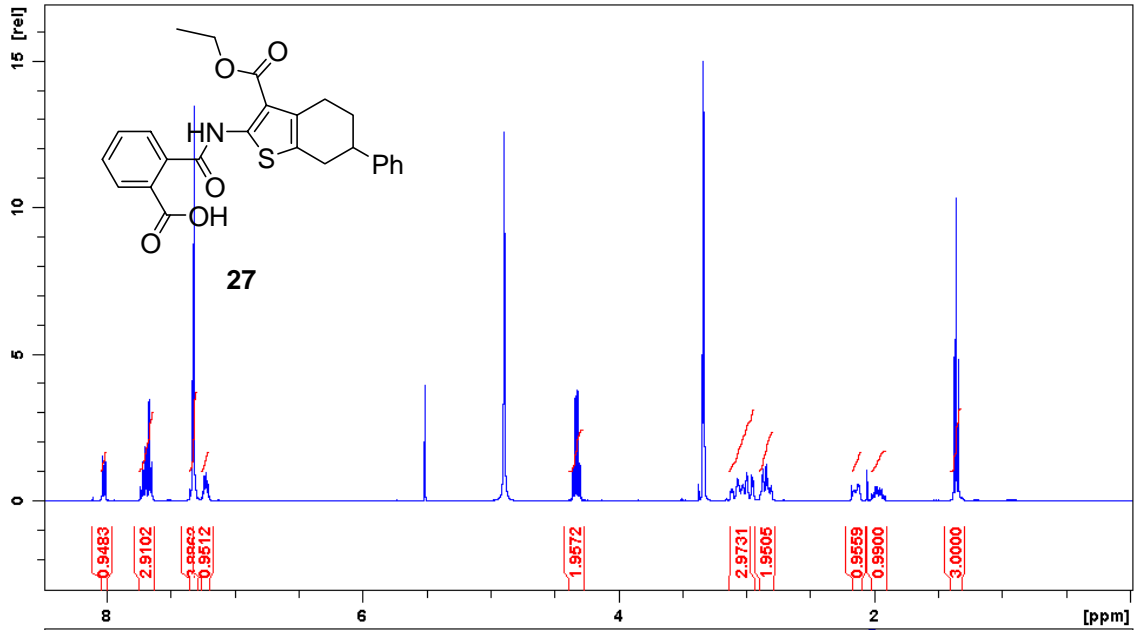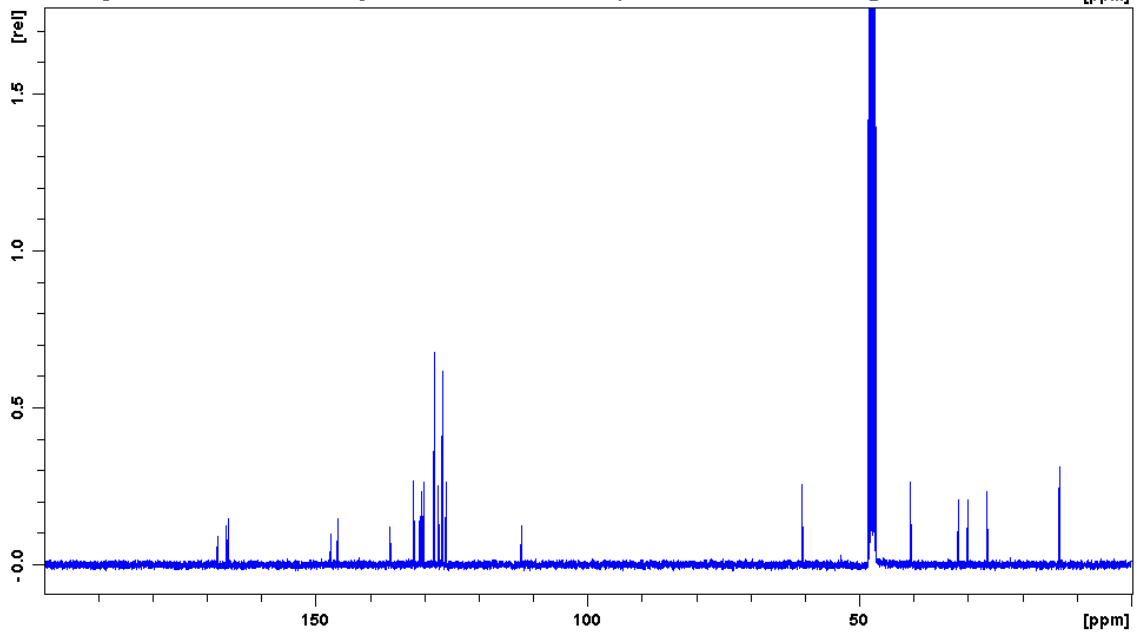

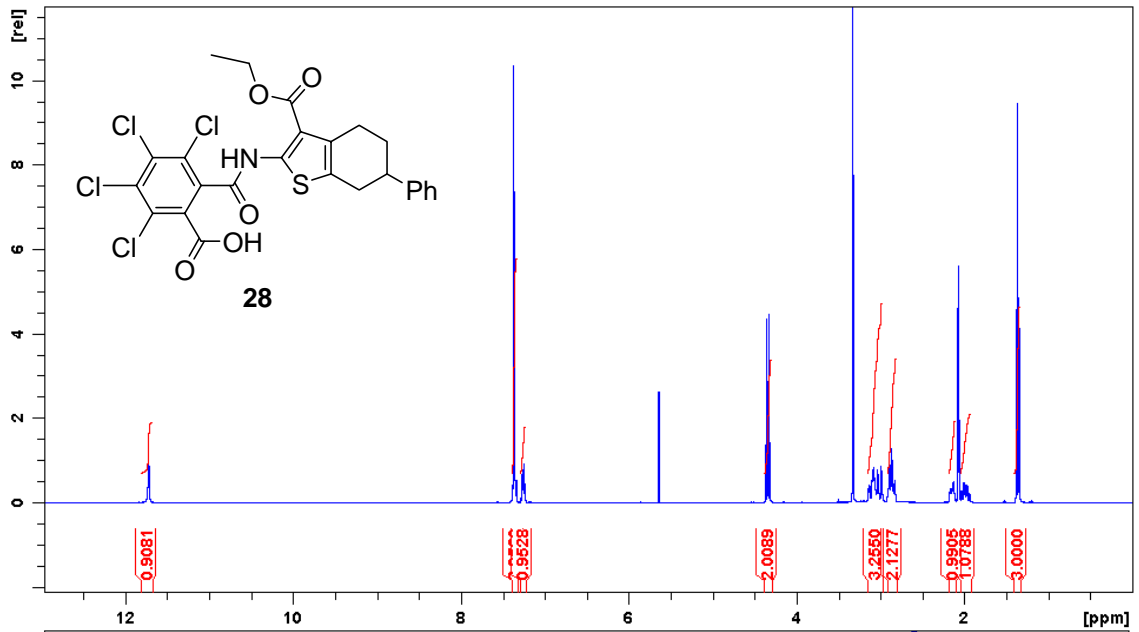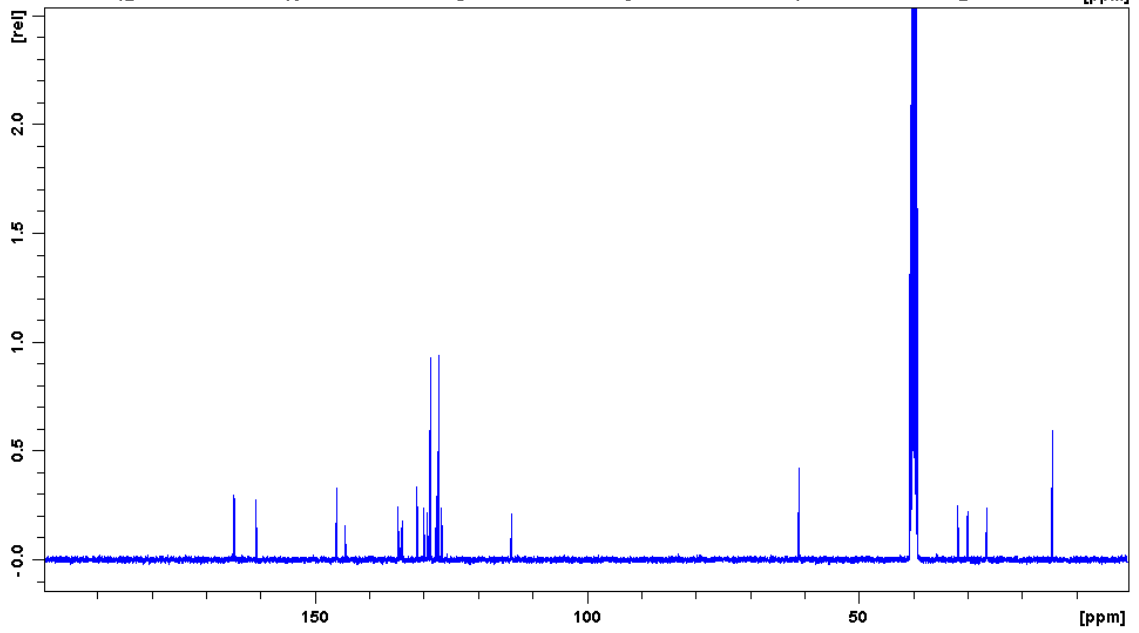

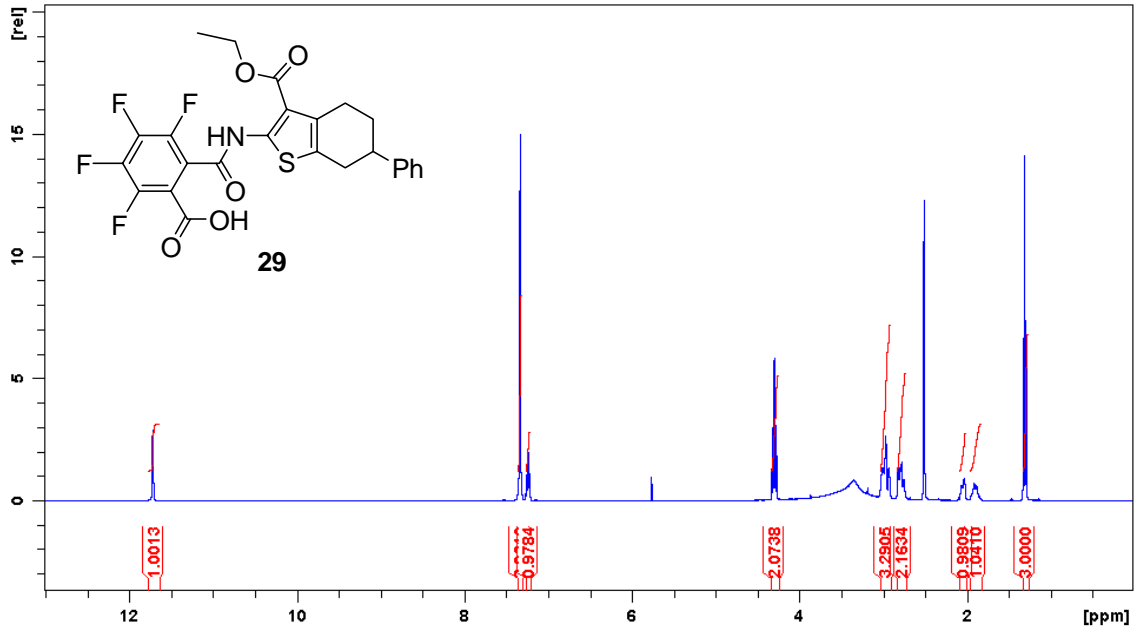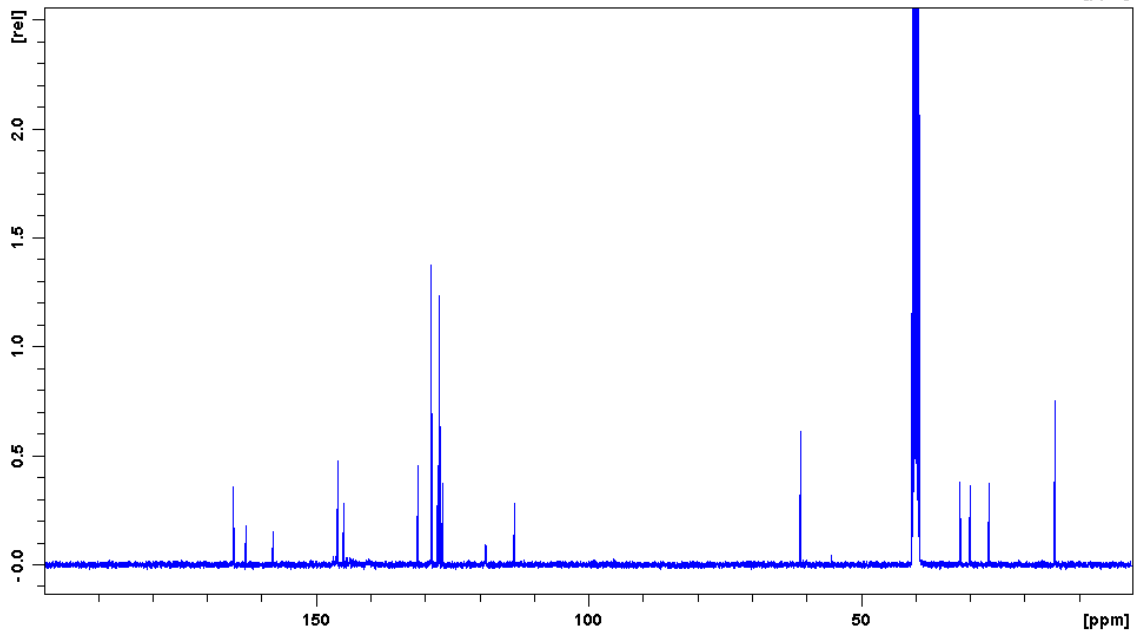

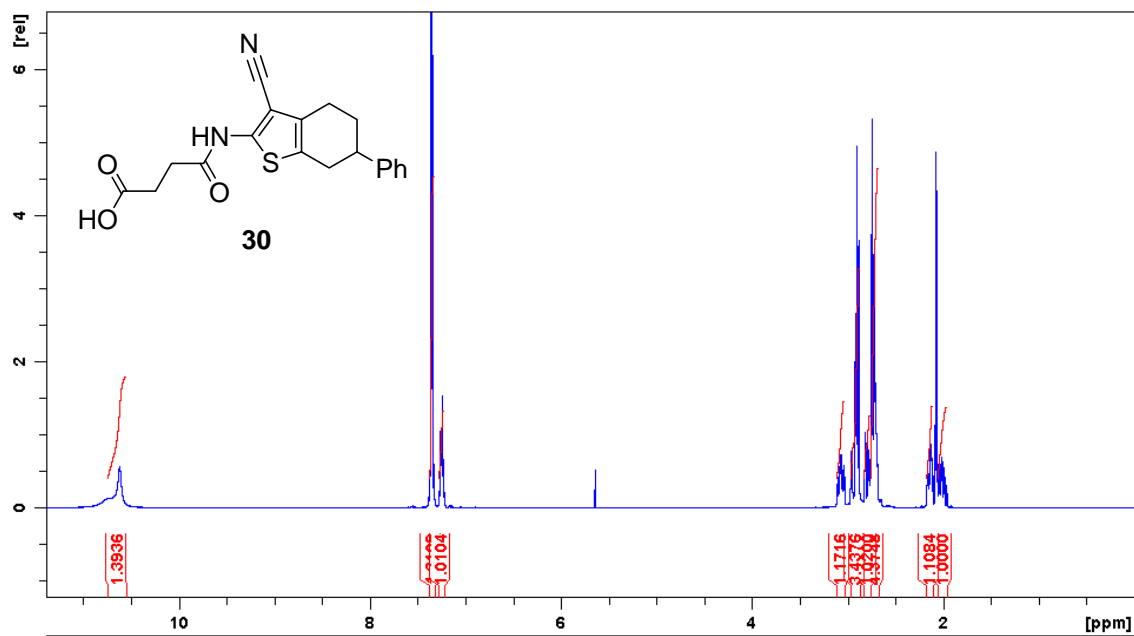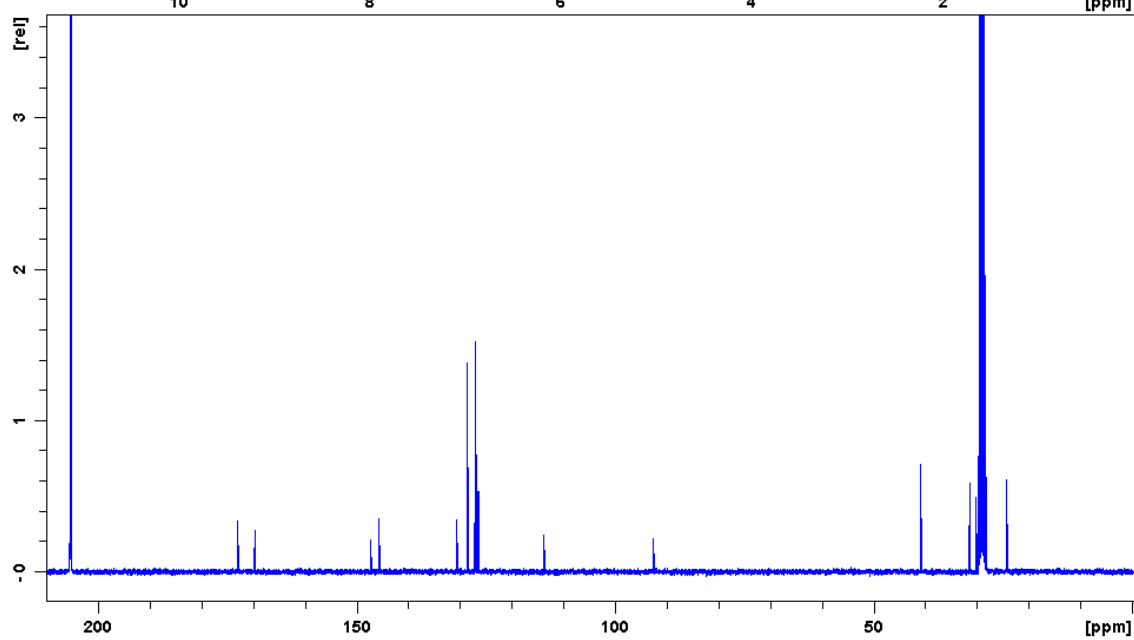



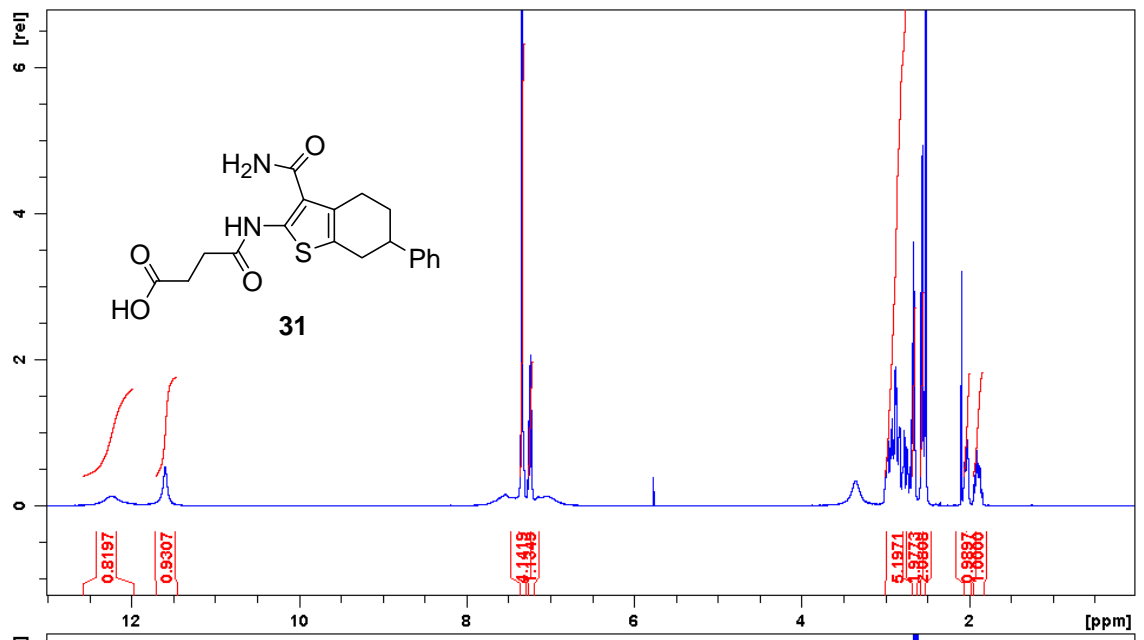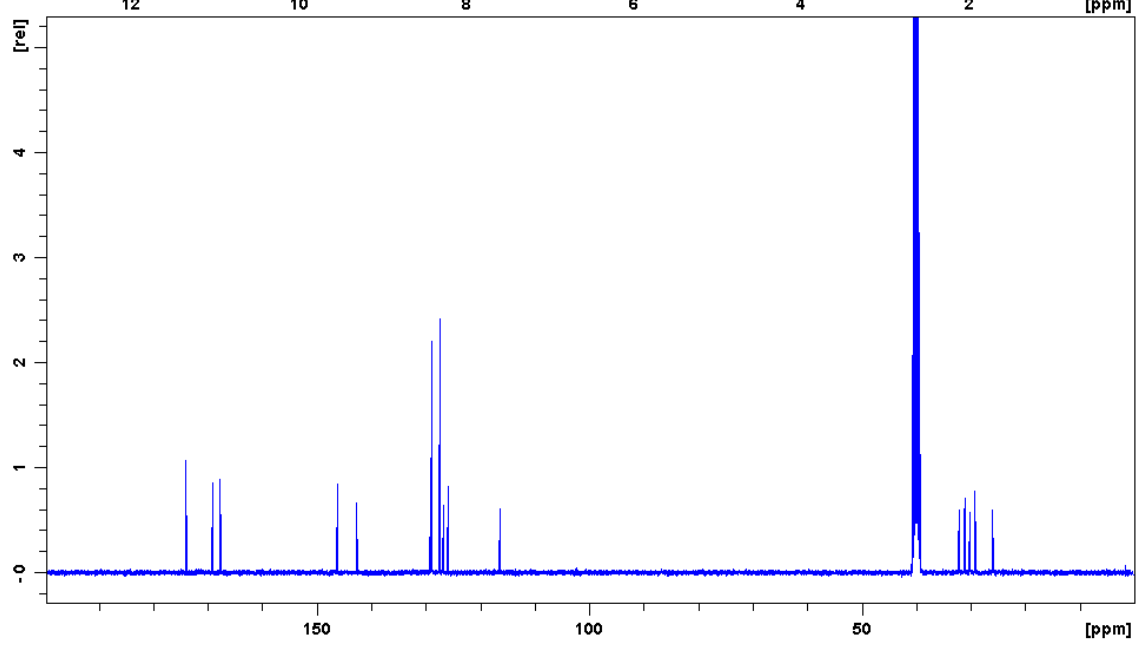

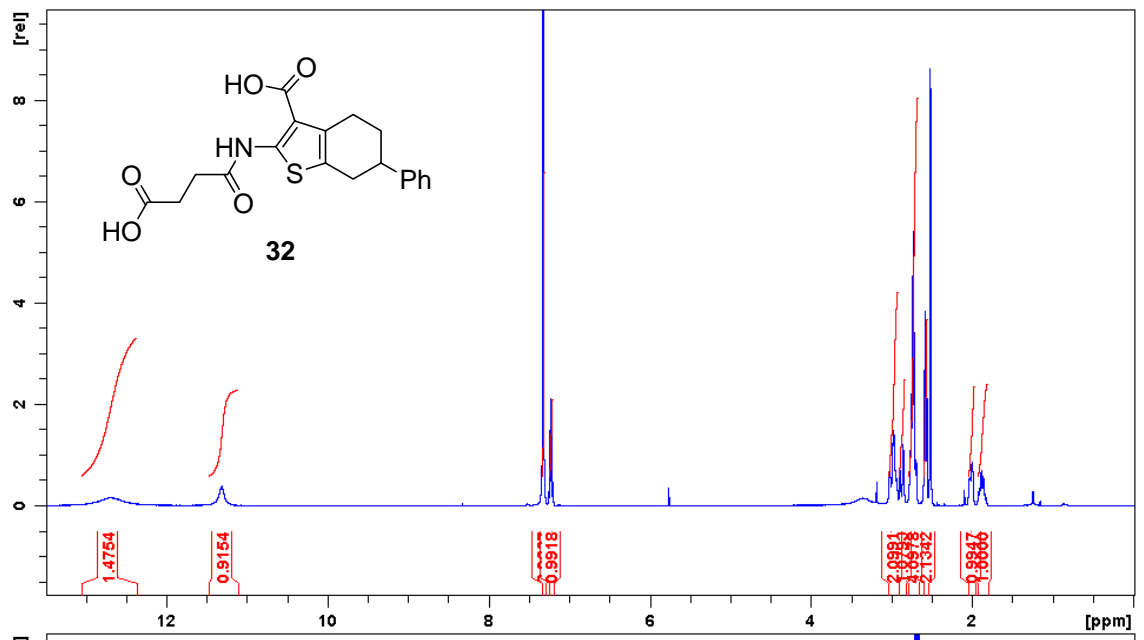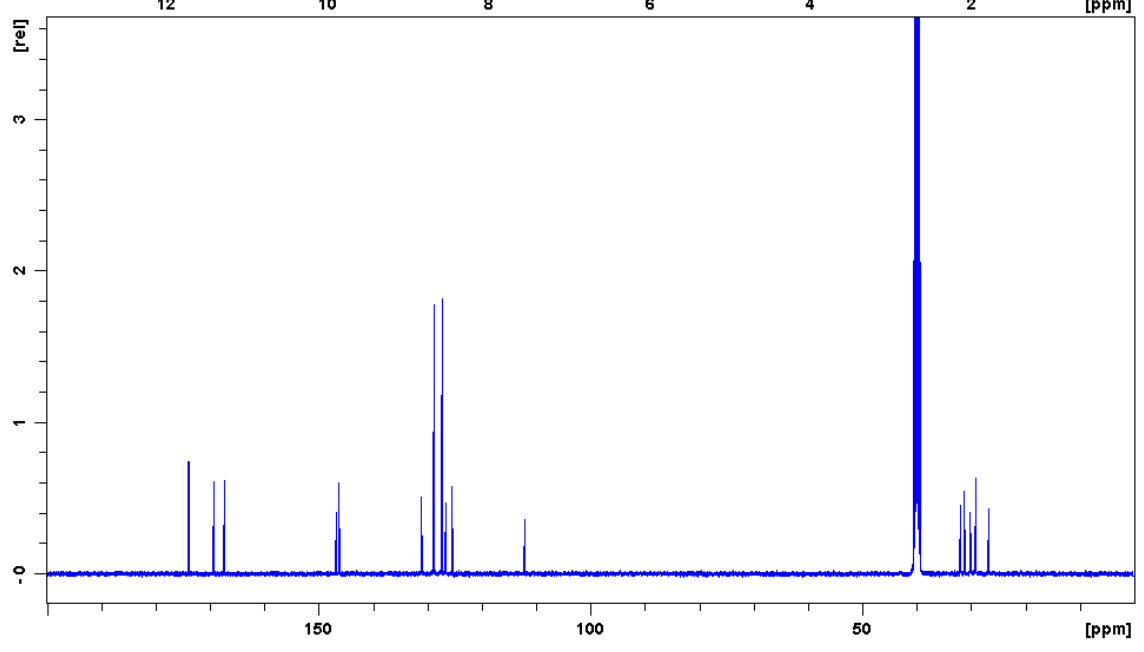

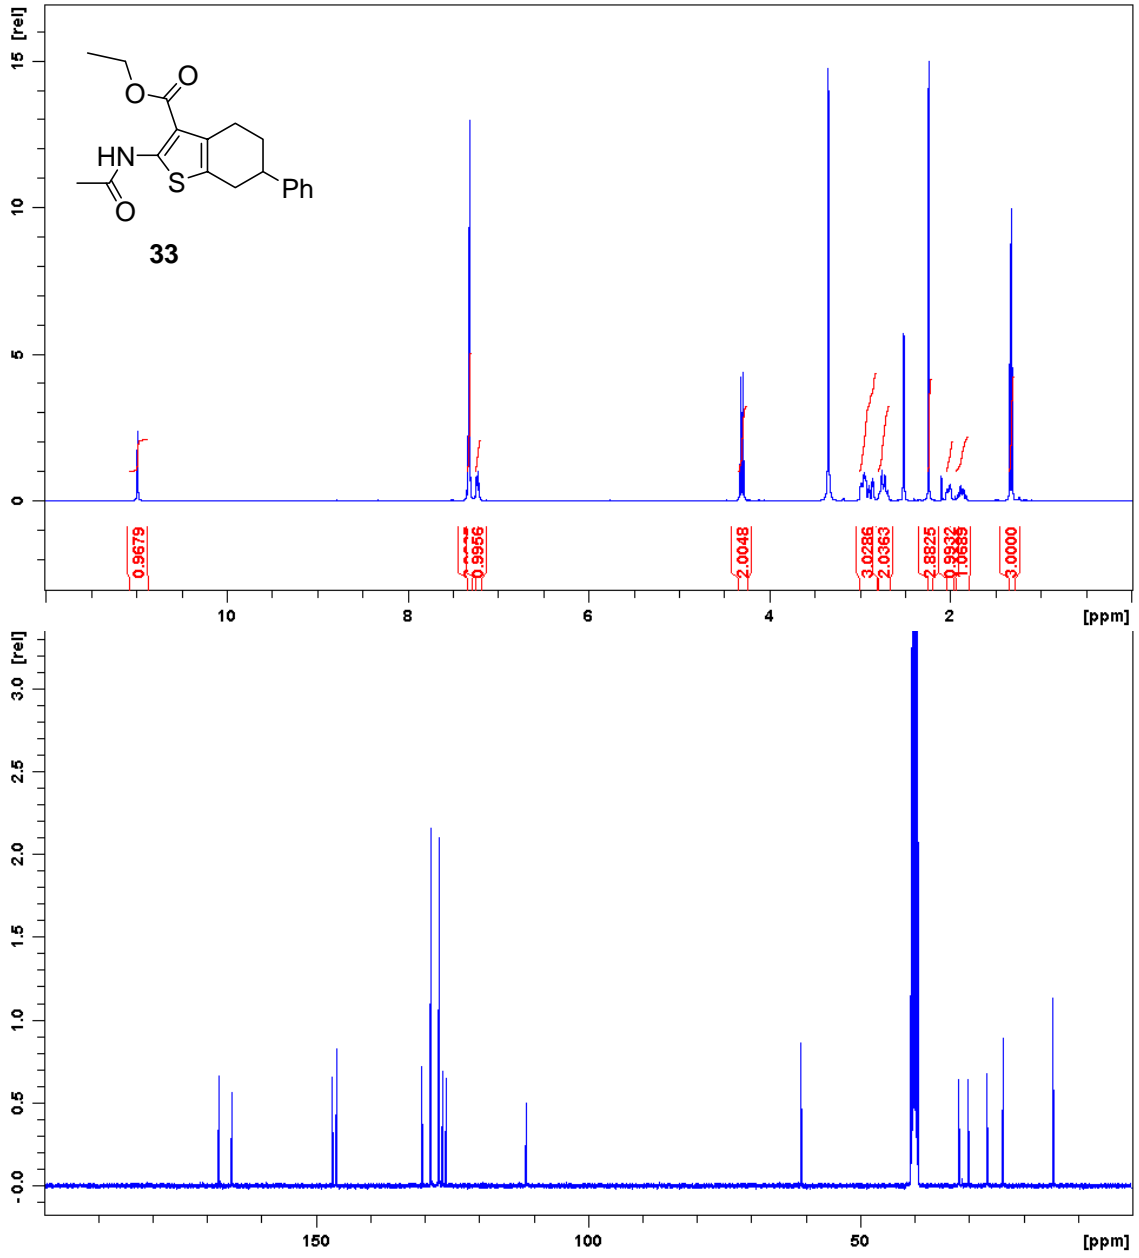

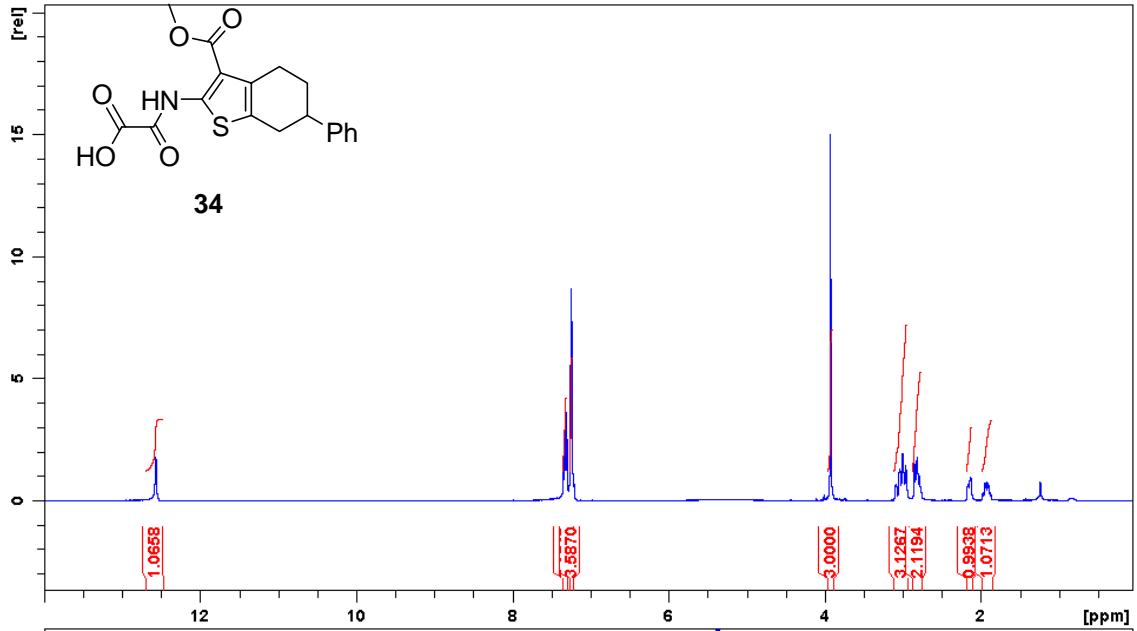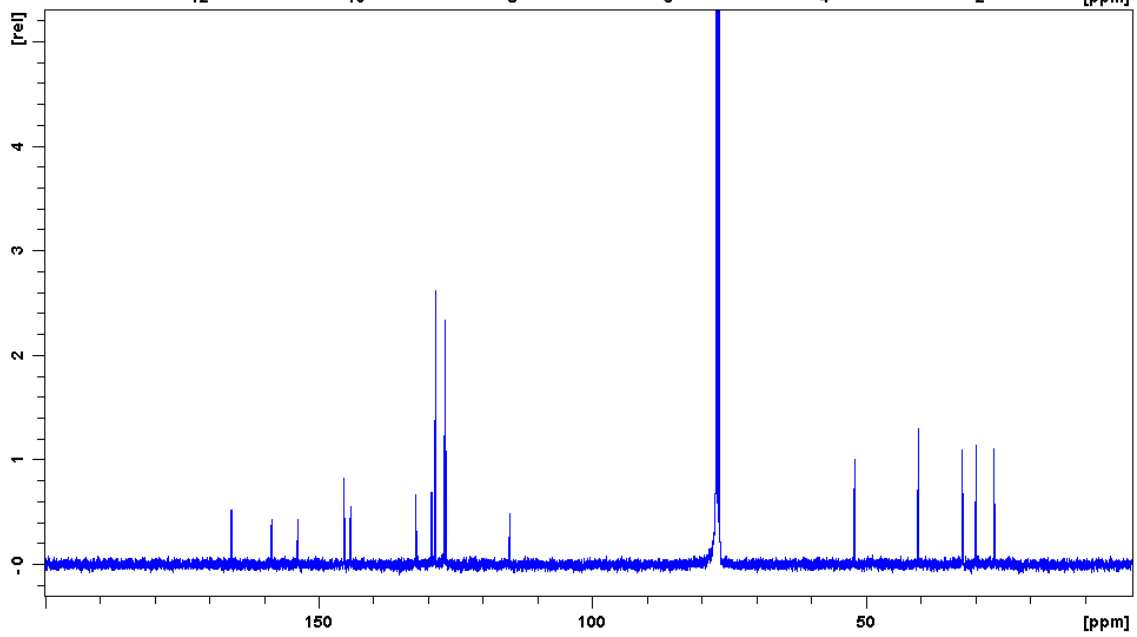

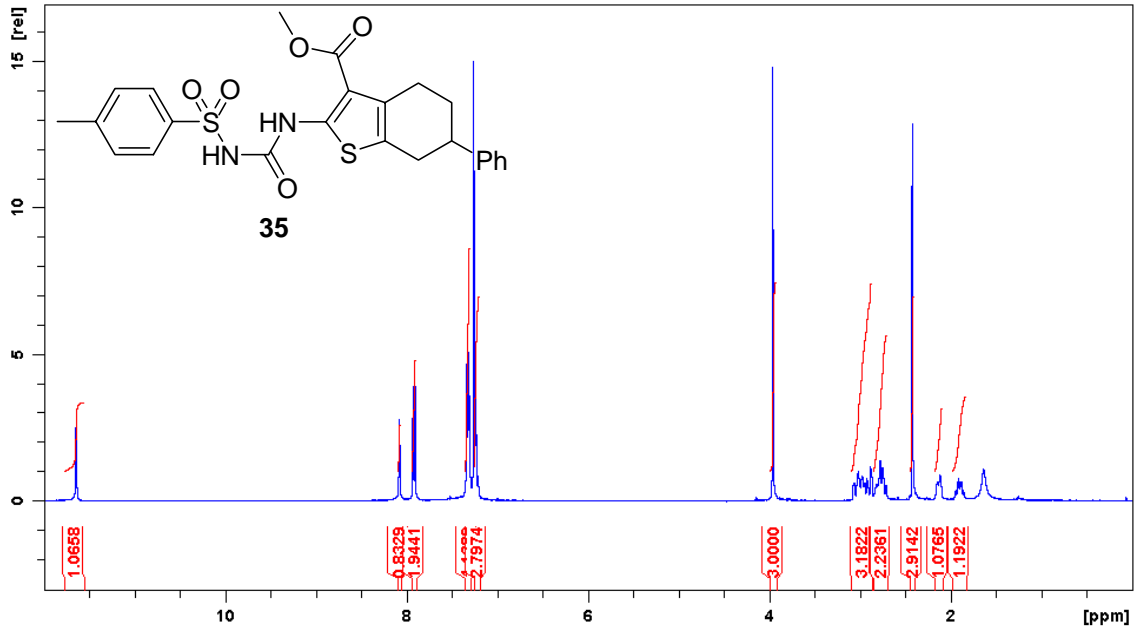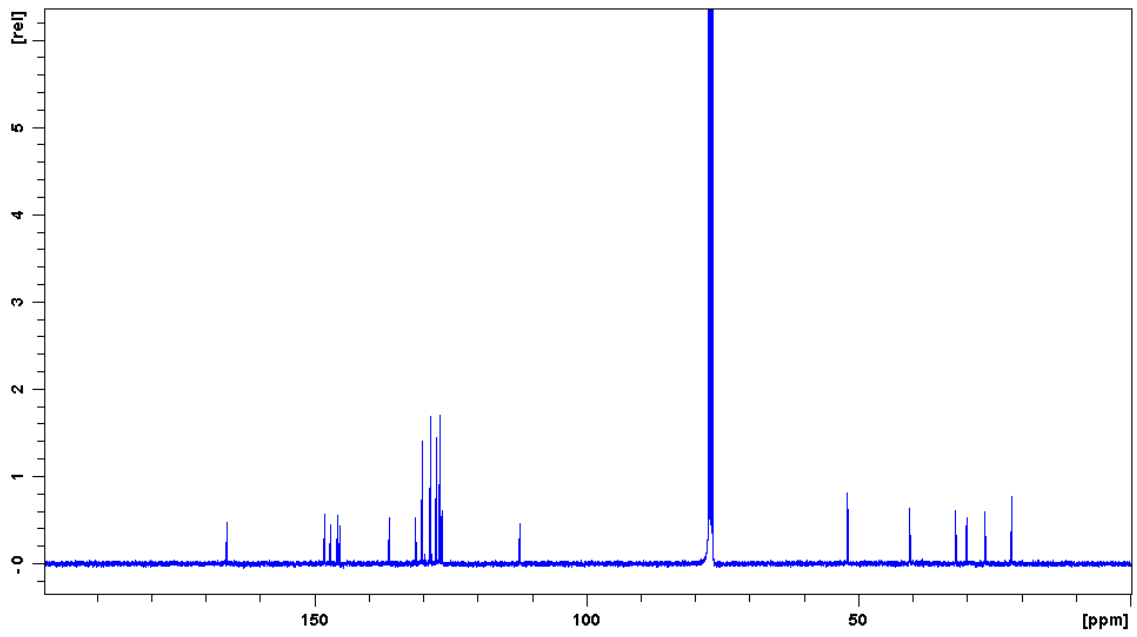

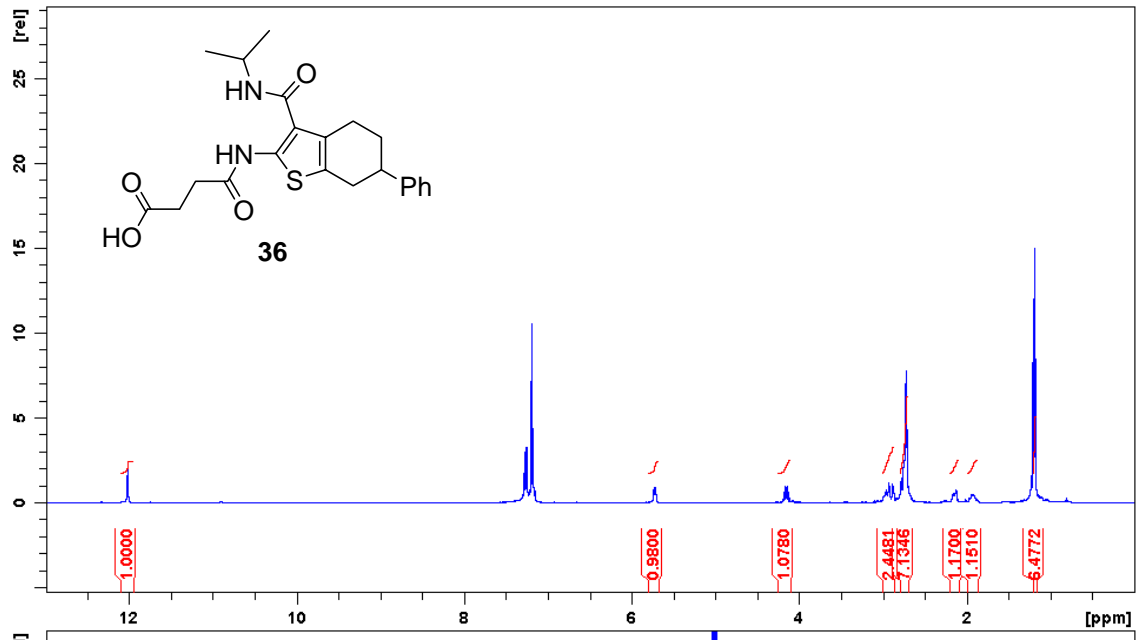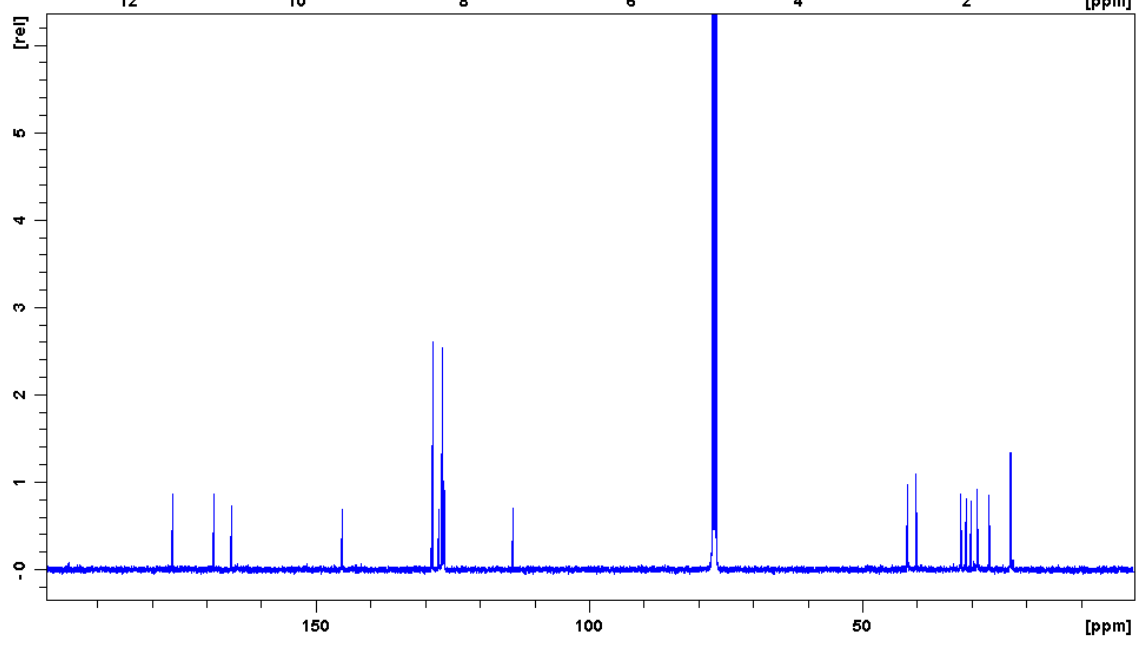

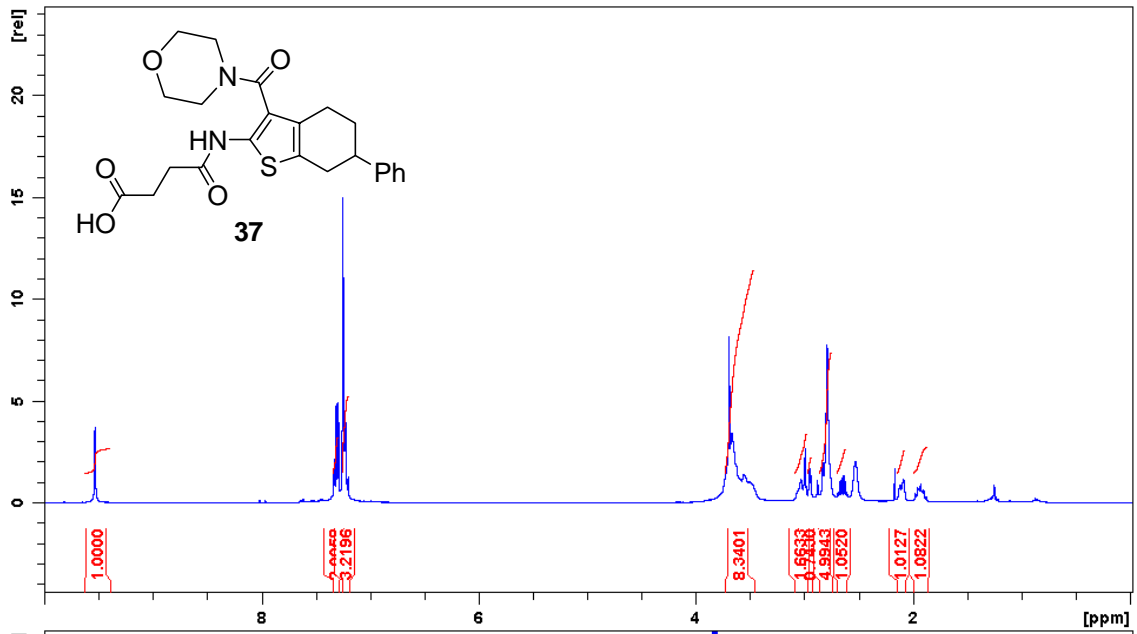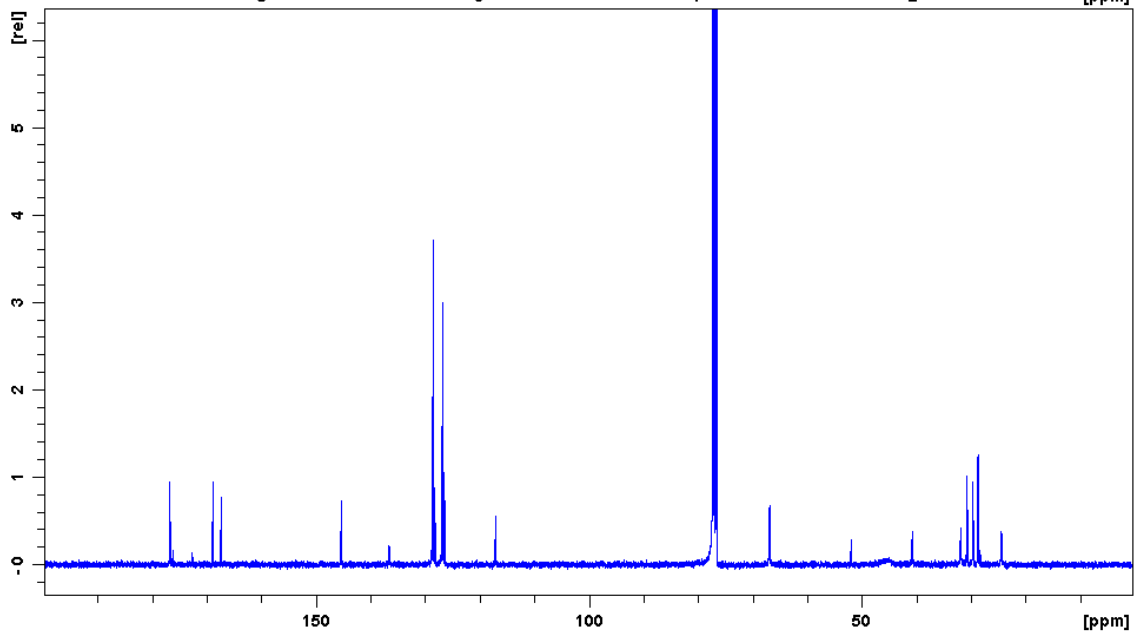

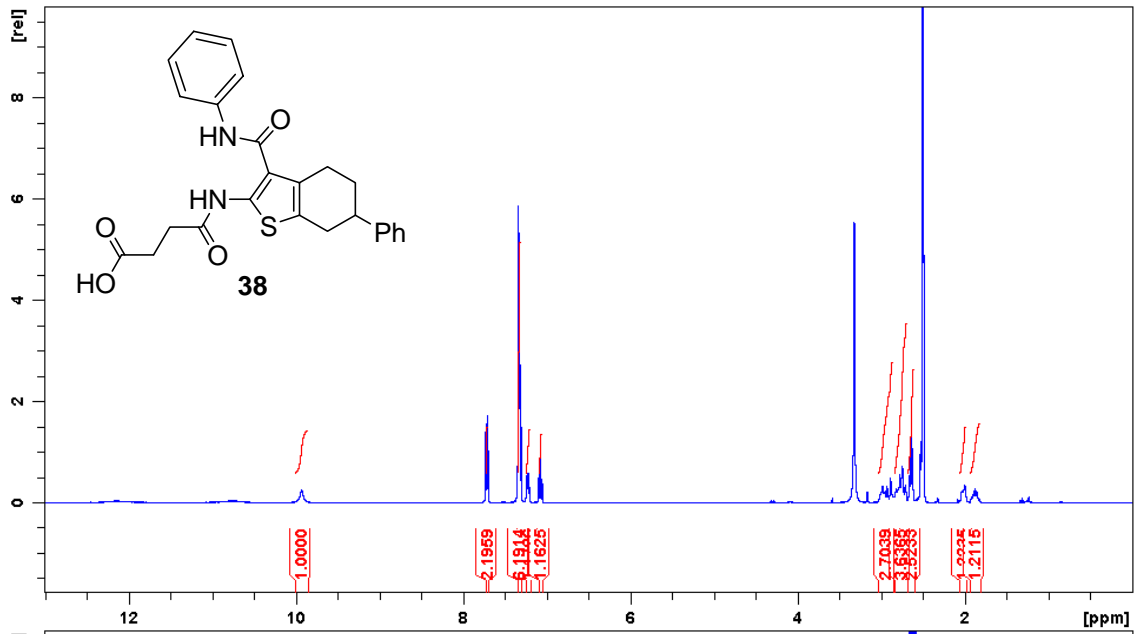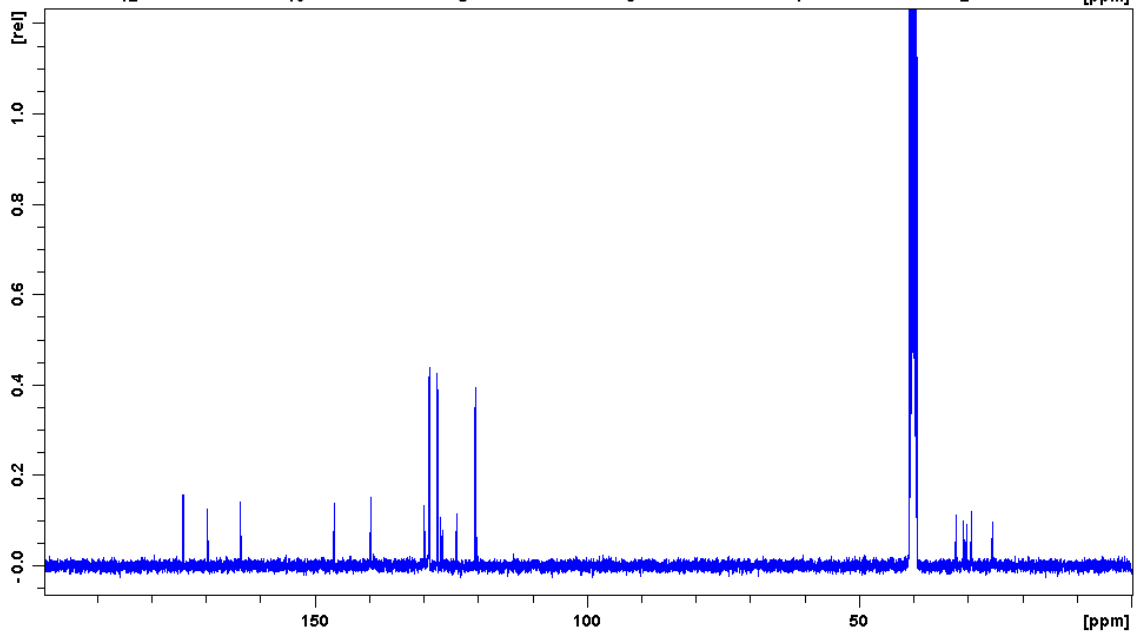



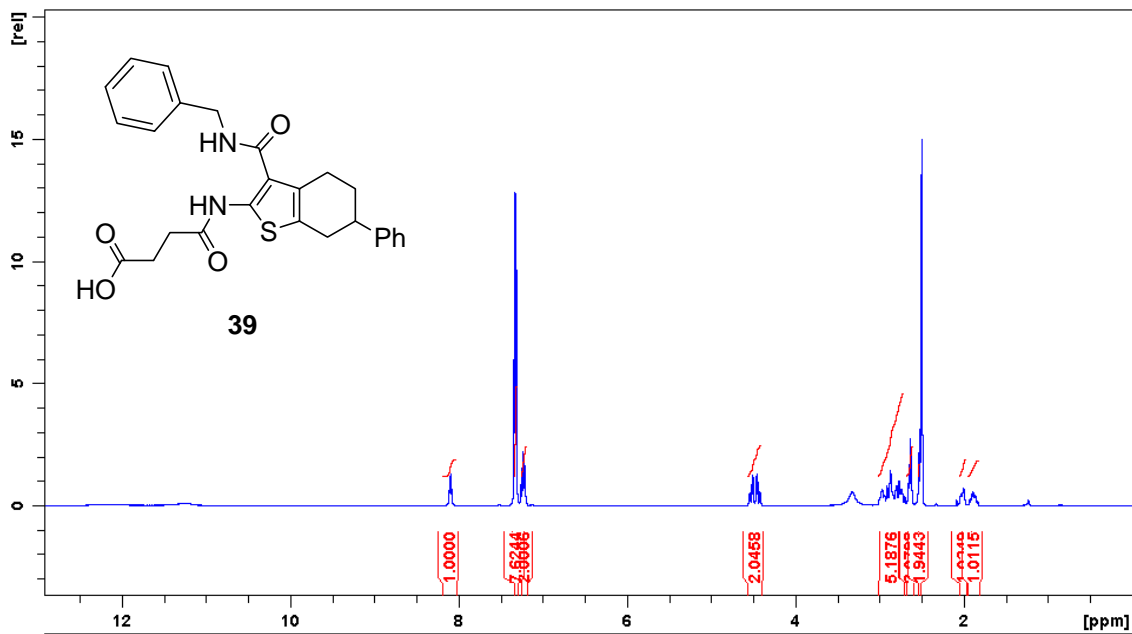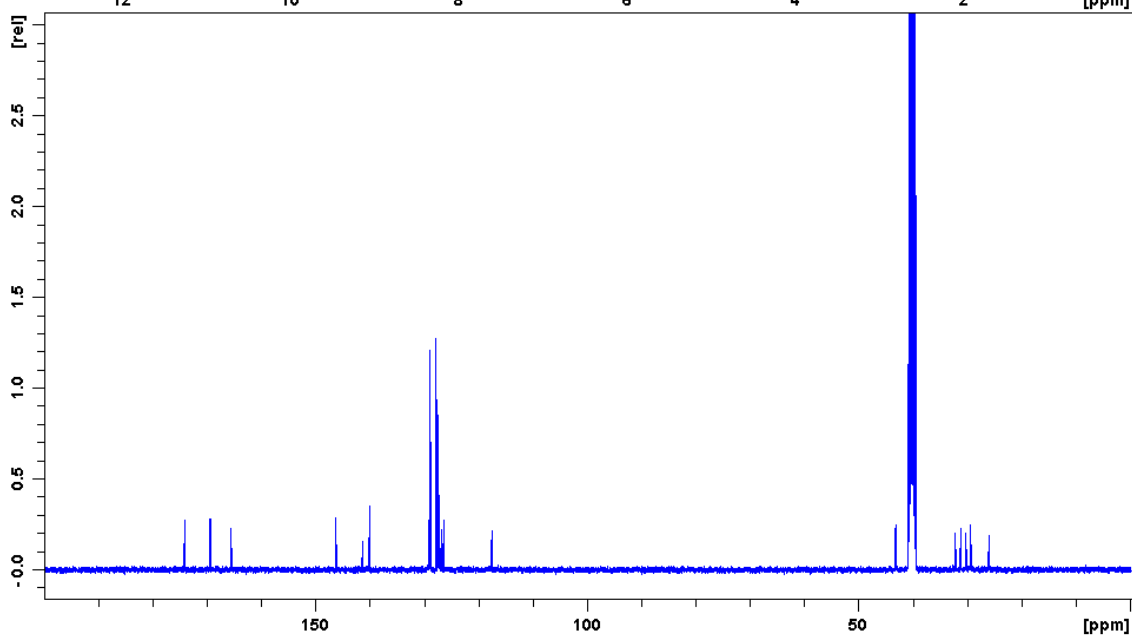

Supplement: NIHMS577400-supplement-ESI.pdf [file NIHMS577400-supplement-ESI.pdf]
